# Supplementary material
Source: publisher figshare collection journal article supplement (https://gsajournals.figshare.com/articles/dataset/_/12276584)
Supplement: Supplementary file 1 [file 1]

Yow et al., **Genome Sequence of *Monilinia vaccinii-corymbosi* Sheds Light on Mummy Berry Disease Infection of Blueberry and Mating Type**

TABLE S1. Summary statistics of PacBio genomic library Sequel and RSII runs.

| <b>Name</b>        | <b>Total Bases (Gb)</b> | <b>Number of Subreads</b> | <b>Total Length of Subreads (bp)</b> | <b>Average Subread Length (bp)</b> |
|--------------------|-------------------------|---------------------------|--------------------------------------|------------------------------------|
| NCSU Sequel SMRT 1 | 2.3                     | 598,771                   | 2,266,251,245                        | 4,135                              |
| NCSU Sequel SMRT 2 | 2.2                     | 559,740                   | 2,180,250,324                        | 4,419                              |
| NCSU Sequel SMRT 3 | 2.6                     | 683,036                   | 2,570,244,405                        | 4,355                              |
| NCSU Sequel SMRT 4 | 2.8                     | 863,469                   | 2,786,669,336                        | 3,513                              |
| UF RSII SMRT 1     | 1.4                     | 194,830                   | 1,455,041,026                        | 7,539                              |
| UF RSII SMRT 2     | 1.1                     | 152,785                   | 1,082,248,013                        | 7,160                              |
| <b>Total</b>       | 12.4                    | 3,052,631                 | 12,340,704,349                       | -                                  |

TABLE S2. Summary statistics of Hi-C library Illumina NextSeq500 run.

| <b>Name</b>  | <b>Total Bases (bp)</b> | <b>Number of Reads</b> | <b>Total Bases After Trimming (bp)</b> | <b>Number of Reads After Trimming</b> |
|--------------|-------------------------|------------------------|----------------------------------------|---------------------------------------|
| Mvc-RL1 Hi-C | 26,005,669,980          | 172,222,980            | 22,837,383,723                         | 172,200,538                           |

Yow et al., **Genome Sequence of *Monilinia vaccinii-corymbosi* Sheds Light on Mummy Berry Disease Infection of Blueberry and Mating Type**

TABLE S3. Contig makeup for *Monilinia vaccinii-corymbosi* HGAP4\_59 Assembly.

| Contig Name     | Contig Length (bp) | Sequence Content |
|-----------------|--------------------|------------------|
| MvcIV1-Contig1  | 5,195,418          | Nuclear          |
| MvcIV1-Contig2  | 4,062,641          | Nuclear          |
| MvcIV1-Contig3  | 3,929,668          | Nuclear          |
| MvcIV1-Contig4  | 3,635,407          | Nuclear          |
| MvcIV1-Contig5  | 3,356,619          | Nuclear          |
| MvcIV1-Contig6  | 2,573,042          | Nuclear          |
| MvcIV1-Contig7  | 2,240,868          | Nuclear          |
| MvcIV1-Contig8  | 1,745,410          | Nuclear          |
| MvcIV1-Contig9  | 1,415,376          | Nuclear          |
| MvcIV1-Contig10 | 1,312,492          | Nuclear          |
| MvcIV1-Contig11 | 540,959            | Nuclear          |
| MvcIV1-Contig12 | 122,821            | mitochondrial    |
| MvcIV1-Contig13 | 57,143             | rDNA repeat      |
| MvcIV1-Contig14 | 51,741             | mitochondrial    |
| MvcIV1-Contig15 | 50,784             | rDNA repeat      |
| MvcIV1-Contig16 | 50,106             | rDNA repeat      |
| MvcIV1-Contig17 | 35,562             | mitochondrial    |
| MvcIV1-Contig18 | 32,565             | mitochondrial    |
| MvcIV1-Contig19 | 29,674             | mitochondrial    |
| MvcIV1-Contig20 | 28,469             | mitochondrial    |
| MvcIV1-Contig21 | 27,795             | mitochondrial    |
| MvcIV1-Contig22 | 27,483             | mitochondrial    |
| MvcIV1-Contig23 | 24,953             | mitochondrial    |
| MvcIV1-Contig24 | 24,029             | mitochondrial    |
| MvcIV1-Contig25 | 23,915             | mitochondrial    |
| MvcIV1-Contig26 | 22,919             | rDNA repeat      |
| MvcIV1-Contig27 | 22,452             | mitochondrial    |
| MvcIV1-Contig28 | 22,343             | mitochondrial    |
| MvcIV1-Contig29 | 20,839             | mitochondrial    |
| MvcIV1-Contig30 | 20,549             | mitochondrial    |
| MvcIV1-Contig31 | 20,034             | mitochondrial    |
| MvcIV1-Contig32 | 18,380             | mitochondrial    |
| MvcIV1-Contig33 | 16,447             | mitochondrial    |
| MvcIV1-Contig34 | 15,865             | mitochondrial    |
| MvcIV1-Contig35 | 15,716             | mitochondrial    |
| MvcIV1-Contig36 | 15,655             | mitochondrial    |
| MvcIV1-Contig37 | 15,341             | mitochondrial    |
| MvcIV1-Contig38 | 13,399             | rDNA repeat      |
| MvcIV1-Contig39 | 13,335             | mitochondrial    |

**Yow et al., Genome Sequence of *Monilinia vaccinii-corymbosi* Sheds Light on Mummy Berry Disease Infection of Blueberry and Mating Type**

| Contig Name     | Contig Length (bp) | Sequence Content |
|-----------------|--------------------|------------------|
| MvcIV1-Contig40 | 12,349             | mitochondrial    |
| MvcIV1-Contig41 | 11,873             | rDNA repeat      |
| MvcIV1-Contig42 | 11,537             | rDNA repeat      |
| MvcIV1-Contig43 | 10,999             | mitochondrial    |
| MvcIV1-Contig44 | 10,688             | nuclear*         |
| MvcIV1-Contig45 | 10,569             | mitochondrial    |
| MvcIV1-Contig46 | 9,163              | mitochondrial    |
| MvcIV1-Contig47 | 8,857              | mitochondrial    |
| MvcIV1-Contig48 | 8,756              | rDNA repeat      |
| MvcIV1-Contig49 | 7,481              | mitochondrial    |
| MvcIV1-Contig50 | 6,982              | mitochondrial    |
| MvcIV1-Contig51 | 6,698              | mitochondrial    |
| MvcIV1-Contig52 | 6,272              | mitochondrial    |
| MvcIV1-Contig53 | 6,238              | mitochondrial    |
| MvcIV1-Contig54 | 4,703              | mitochondrial    |
| MvcIV1-Contig55 | 4,209              | mitochondrial    |
| MvcIV1-Contig56 | 4,096              | mitochondrial    |
| MvcIV1-Contig57 | 4,035              | mitochondrial    |
| MvcIV1-Contig58 | 3,536              | mitochondrial    |
| MvcIV1-Contig59 | 1,353              | mitochondrial    |

Asterisk (\*) denote a small nuclear contig encoding a retrotransposon and low complexity sequences.

Yow et al., **Genome Sequence of *Monilinia vaccinii-corymbosi* Sheds Light on Mummy Berry Disease Infection of Blueberry and Mating Type**

TABLE S4. Statistics for centromeric regions of *Monilinia vaccinii-corymbosi* (Mvc) nuclear genome scaffolds.

| Scaffold ID      | Scaffold Length | Estimated Centromere Length | GC Content (%) | Number of Genes | Number of Genes Per Kb | Tandem Repeats |
|------------------|-----------------|-----------------------------|----------------|-----------------|------------------------|----------------|
| Mvc_scaffold_01  | 6,208,549       | 32,000                      | 33.8           | 5               | 0.16                   | 47             |
| Mvc_scaffold_02  | 5,195,418       | 38,000                      | 23.5           | 3               | 0.08                   | 93             |
| Mvc_scaffold_03  | 4,062,641       | 30,000                      | 24.3           | 6               | 0.20                   | 106            |
| Mvc_scaffold_04  | 3,929,668       | 30,000                      | 25.9           | 6               | 0.20                   | 59             |
| Mvc_scaffold_05  | 3,356,619       | 35,000                      | 23.0           | 5               | 0.14                   | 87             |
| Mvc_scaffold_06  | 2,240,868       | 38,000                      | 22.7           | 4               | 0.11                   | 101            |
| Mvc_scaffold_07* | 1,853,551       | 50,000                      | 44.5           | 17              | 0.34                   | 20             |
| Mvc_scaffold_08  | 1,745,410       | 29,000                      | 17.7           | 5               | 0.17                   | 32             |
| Mvc_scaffold_09  | 1,415,376       | 41,000                      | 23.8           | 4               | 0.10                   | 66             |

\*Scaffold 07 does not appear to have an actual centromere.

TABLE S5. Results for Repeat-Induced Point (RIP) di-nucleotide mutation analysis of *Monilinia vaccinii-corymbosi* genomic repeats. Alignment-based RIP mutation analysis was performed using the degenerate consensus model of RIPCAL v2.0.

| Repeat Class | CA → TA | CC → TC | CG → TG | CT → TT | CA → TA | CC → TC | CG → TG | CT → TT |
|--------------|---------|---------|---------|---------|---------|---------|---------|---------|
|              |         |         |         |         | CN → TN | CN → TN | CN → TN | CN → TN |
| Copia        | 735     | 204     | 182.67  | 586.17  | 0.43    | 0.12    | 0.11    | 0.34    |
| MuDR         | 122.5   | 104.75  | 9       | 354.5   | 0.21    | 0.18    | 0.02    | 0.60    |
| rRNA         | 1173.92 | 2109.58 | 1644.33 | 1571.08 | 0.18    | 0.32    | 0.25    | 0.24    |
| Gypsy        | 8249.92 | 1548.03 | 2727.75 | 10320   | 0.36    | 0.07    | 0.12    | 0.45    |
| EnSpm-CACTA  | 18      | 3       | 40.5    | 36      | 0.18    | 0.03    | 0.42    | 0.37    |
| Tad1         | 179.25  | 58.33   | 104.5   | 181.67  | 0.34    | 0.11    | 0.20    | 0.35    |
| Mariner      | 80      | 26.5    | 25.5    | 89.5    | 0.36    | 0.12    | 0.12    | 0.40    |
| Harbinger    | 19.75   | 45.5    | 4.5     | 111     | 0.11    | 0.25    | 0.02    | 0.61    |

Yow et al., **Genome Sequence of *Monilinia vaccinii-corymbosi* Sheds Light on Mummy Berry Disease Infection of Blueberry and Mating Type**

TABLE S6. Fisher's Exact Test results for GO cellular component term enrichment of putative effectors identified by EffectorP in *Monilinia vaccinii-corymbosi* (*Mvc*). The EffectorP subset was compared to the entire set of *Mvc* predicted gene models.

| Tags    | GO ID      | GO Name                                      | GO Category        | FDR      |
|---------|------------|----------------------------------------------|--------------------|----------|
| [UNDER] | GO:0110165 | cellular anatomical entity                   | CELLULAR_COMPONENT | 1.53E-14 |
| [UNDER] | GO:0005622 | intracellular                                | CELLULAR_COMPONENT | 4.45E-12 |
| [UNDER] | GO:0043229 | intracellular organelle                      | CELLULAR_COMPONENT | 2.63E-09 |
| [UNDER] | GO:0043226 | organelle                                    | CELLULAR_COMPONENT | 2.63E-09 |
| [UNDER] | GO:0043227 | membrane-bounded organelle                   | CELLULAR_COMPONENT | 5.18E-08 |
| [UNDER] | GO:0043231 | intracellular membrane-bounded organelle     | CELLULAR_COMPONENT | 1.32E-07 |
| [UNDER] | GO:0032991 | protein-containing complex                   | CELLULAR_COMPONENT | 8.95E-07 |
| [UNDER] | GO:0005634 | nucleus                                      | CELLULAR_COMPONENT | 1.49E-06 |
| [UNDER] | GO:0005737 | cytoplasm                                    | CELLULAR_COMPONENT | 1.58E-06 |
| [UNDER] | GO:0043228 | non-membrane-bounded organelle               | CELLULAR_COMPONENT | 2.52E-04 |
| [UNDER] | GO:0043232 | intracellular non-membrane-bounded organelle | CELLULAR_COMPONENT | 2.52E-04 |

Yow et al., **Genome Sequence of *Monilinia vaccinii-corymbosi* Sheds Light on Mummy Berry Disease Infection of Blueberry and Mating Type**

TABLE S7. Distribution of the *Monilinia vaccinii-corymbosi* CAZyome predicted by dbCAN2.

| Enzyme Class              | Family | Number of Sequences |
|---------------------------|--------|---------------------|
| Glycoside hydrolases (GH) | GH1    | 3                   |
|                           | GH2    | 2                   |
|                           | GH3    | 9                   |
|                           | GH5    | 14                  |
|                           | GH6    | 1                   |
|                           | GH7    | 3                   |
|                           | GH10   | 2                   |
|                           | GH11   | 2                   |
|                           | GH12   | 3                   |
|                           | GH13   | 9                   |
|                           | GH15   | 3                   |
|                           | GH16   | 18                  |
|                           | GH17   | 6                   |
|                           | GH18   | 10                  |
|                           | GH20   | 1                   |
|                           | GH26   | 1                   |
|                           | GH27   | 3                   |
|                           | GH28   | 16                  |
|                           | GH31   | 4                   |
|                           | GH32   | 1                   |
|                           | GH35   | 3                   |
|                           | GH36   | 1                   |
|                           | GH37   | 1                   |
|                           | GH38   | 1                   |
|                           | GH43   | 6                   |
|                           | GH45   | 2                   |
|                           | GH47   | 7                   |
|                           | GH51   | 2                   |

Yow et al., Genome Sequence of *Monilinia vaccinii-corymbosi* Sheds Light on Mummy Berry Disease Infection of Blueberry and Mating Type

| Enzyme Class              | Family | Number of Sequences |
|---------------------------|--------|---------------------|
|                           | GH53   | 2                   |
|                           | GH54   | 1                   |
|                           | GH55   | 3                   |
|                           | GH63   | 1                   |
|                           | GH64   | 2                   |
|                           | GH65   | 2                   |
|                           | GH71   | 3                   |
|                           | GH72   | 5                   |
|                           | GH76   | 9                   |
|                           | GH78   | 3                   |
|                           | GH79   | 2                   |
|                           | GH81   | 1                   |
|                           | GH89   | 1                   |
|                           | GH92   | 5                   |
|                           | GH93   | 1                   |
|                           | GH95   | 1                   |
|                           | GH105  | 2                   |
|                           | GH106  | 1                   |
|                           | GH114  | 1                   |
|                           | GH115  | 1                   |
|                           | GH125  | 3                   |
|                           | GH127  | 2                   |
|                           | GH128  | 4                   |
|                           | GH131  | 2                   |
|                           | GH132  | 2                   |
|                           | GH135  | 2                   |
|                           | GH145  | 1                   |
|                           | GH152  | 1                   |
|                           | Total  | 198                 |
| Glycosyltransferases (GT) | GT1    | 5                   |

Yow et al., **Genome Sequence of *Monilinia vaccinii-corymbosi* Sheds Light on Mummy Berry Disease Infection of Blueberry and Mating Type**

| Enzyme Class | Family | Number of Sequences |
|--------------|--------|---------------------|
|              | GT2    | 17                  |
|              | GT3    | 1                   |
|              | GT4    | 4                   |
|              | GT8    | 5                   |
|              | GT15   | 4                   |
|              | GT17   | 2                   |
|              | GT20   | 3                   |
|              | GT21   | 1                   |
|              | GT22   | 4                   |
|              | GT24   | 1                   |
|              | GT25   | 3                   |
|              | GT31   | 4                   |
|              | GT32   | 4                   |
|              | GT33   | 1                   |
|              | GT34   | 2                   |
|              | GT35   | 1                   |
|              | GT39   | 3                   |
|              | GT41   | 2                   |
|              | GT48   | 1                   |
|              | GT50   | 1                   |
|              | GT57   | 2                   |
|              | GT58   | 1                   |
|              | GT59   | 1                   |
|              | GT62   | 3                   |
|              | GT66   | 1                   |
|              | GT69   | 3                   |
|              | GT71   | 5                   |
|              | GT76   | 1                   |
|              | GT90   | 3                   |
|              | Total  | 89                  |



Yow et al., Genome Sequence of *Monilinia vaccinii-corymbosi* Sheds Light on Mummy Berry Disease Infection of Blueberry and Mating Type

| Enzyme Class                      | Family | Number of Sequences |
|-----------------------------------|--------|---------------------|
| Polysaccharide Lyases (PL)        | PL1    | 4                   |
|                                   | PL7    | 1                   |
|                                   | Total  | 5                   |
| Carbohydrate esterases (CE)       | CE4    | 3                   |
|                                   | CE5    | 3                   |
|                                   | CE8    | 4                   |
|                                   | CE9    | 2                   |
|                                   | CE12   | 3                   |
|                                   | CE16   | 6                   |
|                                   | Total  | 21                  |
| Auxiliary Activities (AA)         | AA1    | 8                   |
|                                   | AA3    | 22                  |
|                                   | AA4    | 1                   |
|                                   | AA5    | 4                   |
|                                   | AA6    | 1                   |
|                                   | AA7    | 2                   |
|                                   | AA9    | 7                   |
|                                   | AA11   | 2                   |
|                                   | AA16   | 1                   |
|                                   | Total  | 48                  |
| Carbohydrate-binding module (CBM) | CBM1   | 1                   |
|                                   | CBM18  | 6                   |
|                                   | CBM20  | 2                   |
|                                   | CBM21  | 1                   |
|                                   | CBM24  | 1                   |
|                                   | CBM42  | 1                   |
|                                   | CBM43  | 1                   |
|                                   | CBM48  | 1                   |
|                                   | Total  | 14                  |

# Yow et al., Genome Sequence of *Monilinia vaccinii-corymbosi* Sheds Light on Mummy Berry Disease Infection of Blueberry and Mating Type

TABLE S8. Fisher's Exact Test results for GO biological process term enrichment of CAZymes identified by dbCAN2 in *Monilinia vaccinii-corymbosi* (*Mvc*). The dbCAN2 subset was compared to the entire set of *Mvc* predicted gene models.

| Tags    | GO ID      | GO Name                                             | GO Category        | FDR      |
|---------|------------|-----------------------------------------------------|--------------------|----------|
| [UNDER] | GO:0034641 | cellular nitrogen compound metabolic process        | BIOLOGICAL_PROCESS | 4.06E-34 |
| [UNDER] | GO:0006725 | cellular aromatic compound metabolic process        | BIOLOGICAL_PROCESS | 2.11E-30 |
| [UNDER] | GO:0046483 | heterocycle metabolic process                       | BIOLOGICAL_PROCESS | 2.11E-30 |
| [UNDER] | GO:0006139 | nucleobase-containing compound metabolic process    | BIOLOGICAL_PROCESS | 6.76E-30 |
| [UNDER] | GO:1901360 | organic cyclic compound metabolic process           | BIOLOGICAL_PROCESS | 3.48E-28 |
| [UNDER] | GO:0090304 | nucleic acid metabolic process                      | BIOLOGICAL_PROCESS | 8.56E-27 |
| [UNDER] | GO:0010467 | gene expression                                     | BIOLOGICAL_PROCESS | 1.21E-25 |
| [UNDER] | GO:0044271 | cellular nitrogen compound biosynthetic process     | BIOLOGICAL_PROCESS | 5.16E-22 |
| [UNDER] | GO:0016070 | RNA metabolic process                               | BIOLOGICAL_PROCESS | 7.27E-22 |
| [UNDER] | GO:0065007 | biological regulation                               | BIOLOGICAL_PROCESS | 1.05E-20 |
| [UNDER] | GO:0050789 | regulation of biological process                    | BIOLOGICAL_PROCESS | 2.74E-18 |
| [UNDER] | GO:0050794 | regulation of cellular process                      | BIOLOGICAL_PROCESS | 1.90E-17 |
| [UNDER] | GO:0019438 | aromatic compound biosynthetic process              | BIOLOGICAL_PROCESS | 2.81E-16 |
| [UNDER] | GO:0051179 | localization                                        | BIOLOGICAL_PROCESS | 1.26E-15 |
| [UNDER] | GO:0018130 | heterocycle biosynthetic process                    | BIOLOGICAL_PROCESS | 3.15E-15 |
| [UNDER] | GO:1901362 | organic cyclic compound biosynthetic process        | BIOLOGICAL_PROCESS | 4.38E-15 |
| [UNDER] | GO:0034654 | nucleobase-containing compound biosynthetic process | BIOLOGICAL_PROCESS | 6.30E-15 |
| [UNDER] | GO:0006996 | organelle organization                              | BIOLOGICAL_PROCESS | 2.20E-14 |
| [UNDER] | GO:0019222 | regulation of metabolic process                     | BIOLOGICAL_PROCESS | 3.04E-14 |
| [UNDER] | GO:0060255 | regulation of macromolecule metabolic process       | BIOLOGICAL_PROCESS | 3.79E-14 |
| [UNDER] | GO:0051234 | establishment of localization                       | BIOLOGICAL_PROCESS | 6.65E-14 |
| [UNDER] | GO:0080090 | regulation of primary metabolic process             | BIOLOGICAL_PROCESS | 1.35E-13 |
| [UNDER] | GO:0051171 | regulation of nitrogen compound metabolic process   | BIOLOGICAL_PROCESS | 3.19E-13 |
| [UNDER] | GO:0006810 | transport                                           | BIOLOGICAL_PROCESS | 3.56E-13 |
| [UNDER] | GO:0031323 | regulation of cellular metabolic process            | BIOLOGICAL_PROCESS | 5.66E-13 |
| [UNDER] | GO:0010468 | regulation of gene expression                       | BIOLOGICAL_PROCESS | 7.25E-13 |
| [UNDER] | GO:0031326 | regulation of cellular biosynthetic process         | BIOLOGICAL_PROCESS | 1.68E-12 |
| [UNDER] | GO:0009889 | regulation of biosynthetic process                  | BIOLOGICAL_PROCESS | 1.68E-12 |

Yow et al., **Genome Sequence of *Monilinia vaccinii-corymbosi* Sheds Light on Mummy Berry Disease Infection of Blueberry and Mating Type**

| Tags    | GO ID      | GO Name                                                        | GO Category        | FDR      |
|---------|------------|----------------------------------------------------------------|--------------------|----------|
| [UNDER] | GO:2000112 | regulation of cellular macromolecule biosynthetic process      | BIOLOGICAL_PROCESS | 9.26E-12 |
| [UNDER] | GO:0010556 | regulation of macromolecule biosynthetic process               | BIOLOGICAL_PROCESS | 9.26E-12 |
| [UNDER] | GO:0019219 | regulation of nucleobase-containing compound metabolic process | BIOLOGICAL_PROCESS | 2.14E-11 |
| [UNDER] | GO:0032774 | RNA biosynthetic process                                       | BIOLOGICAL_PROCESS | 3.27E-11 |
| [UNDER] | GO:0097659 | nucleic acid-templated transcription                           | BIOLOGICAL_PROCESS | 4.98E-11 |
| [UNDER] | GO:0006351 | transcription, DNA-templated                                   | BIOLOGICAL_PROCESS | 4.98E-11 |
| [UNDER] | GO:0051252 | regulation of RNA metabolic process                            | BIOLOGICAL_PROCESS | 2.48E-10 |
| [UNDER] | GO:1903506 | regulation of nucleic acid-templated transcription             | BIOLOGICAL_PROCESS | 1.26E-09 |
| [UNDER] | GO:2001141 | regulation of RNA biosynthetic process                         | BIOLOGICAL_PROCESS | 1.26E-09 |
| [UNDER] | GO:0043933 | protein-containing complex subunit organization                | BIOLOGICAL_PROCESS | 1.37E-09 |
| [UNDER] | GO:0006355 | regulation of transcription, DNA-templated                     | BIOLOGICAL_PROCESS | 1.98E-09 |
| [UNDER] | GO:0048522 | positive regulation of cellular process                        | BIOLOGICAL_PROCESS | 1.37E-08 |
| [UNDER] | GO:0071702 | organic substance transport                                    | BIOLOGICAL_PROCESS | 1.66E-08 |
| [UNDER] | GO:0006396 | RNA processing                                                 | BIOLOGICAL_PROCESS | 3.34E-08 |
| [UNDER] | GO:0006366 | transcription by RNA polymerase II                             | BIOLOGICAL_PROCESS | 3.44E-08 |
| [UNDER] | GO:0051641 | cellular localization                                          | BIOLOGICAL_PROCESS | 3.85E-08 |
| [UNDER] | GO:0048518 | positive regulation of biological process                      | BIOLOGICAL_PROCESS | 4.39E-08 |
| [UNDER] | GO:0065003 | protein-containing complex assembly                            | BIOLOGICAL_PROCESS | 4.92E-08 |
| [UNDER] | GO:0006807 | nitrogen compound metabolic process                            | BIOLOGICAL_PROCESS | 1.31E-07 |
| [UNDER] | GO:0048519 | negative regulation of biological process                      | BIOLOGICAL_PROCESS | 1.40E-07 |
| [UNDER] | GO:0034622 | cellular protein-containing complex assembly                   | BIOLOGICAL_PROCESS | 1.68E-07 |
| [UNDER] | GO:0006357 | regulation of transcription by RNA polymerase II               | BIOLOGICAL_PROCESS | 1.72E-07 |
| [UNDER] | GO:0033036 | macromolecule localization                                     | BIOLOGICAL_PROCESS | 1.74E-07 |
| [UNDER] | GO:0051276 | chromosome organization                                        | BIOLOGICAL_PROCESS | 2.13E-07 |
| [UNDER] | GO:0031325 | positive regulation of cellular metabolic process              | BIOLOGICAL_PROCESS | 3.61E-07 |
| [UNDER] | GO:0009893 | positive regulation of metabolic process                       | BIOLOGICAL_PROCESS | 3.91E-07 |
| [UNDER] | GO:0070727 | cellular macromolecule localization                            | BIOLOGICAL_PROCESS | 7.43E-07 |
| [UNDER] | GO:0006259 | DNA metabolic process                                          | BIOLOGICAL_PROCESS | 8.05E-07 |
| [UNDER] | GO:0046907 | intracellular transport                                        | BIOLOGICAL_PROCESS | 9.63E-07 |
| [UNDER] | GO:0034613 | cellular protein localization                                  | BIOLOGICAL_PROCESS | 1.08E-06 |

Yow et al., *Genome Sequence of Monilinia vaccinii-corymbosi* Sheds Light on Mummy Berry Disease Infection of Blueberry and Mating Type

| Tags    | GO ID      | GO Name                                                    | GO Category        | FDR      |
|---------|------------|------------------------------------------------------------|--------------------|----------|
| [UNDER] | GO:0071705 | nitrogen compound transport                                | BIOLOGICAL_PROCESS | 1.09E-06 |
| [UNDER] | GO:0051173 | positive regulation of nitrogen compound metabolic process | BIOLOGICAL_PROCESS | 1.18E-06 |
| [UNDER] | GO:0008104 | protein localization                                       | BIOLOGICAL_PROCESS | 1.56E-06 |
| [UNDER] | GO:0006518 | peptide metabolic process                                  | BIOLOGICAL_PROCESS | 1.74E-06 |
| [UNDER] | GO:0034660 | ncRNA metabolic process                                    | BIOLOGICAL_PROCESS | 1.78E-06 |
| [UNDER] | GO:0010604 | positive regulation of macromolecule metabolic process     | BIOLOGICAL_PROCESS | 1.78E-06 |
| [UNDER] | GO:0055085 | transmembrane transport                                    | BIOLOGICAL_PROCESS | 2.23E-06 |
| [UNDER] | GO:0048523 | negative regulation of cellular process                    | BIOLOGICAL_PROCESS | 4.17E-06 |
| [UNDER] | GO:0016310 | phosphorylation                                            | BIOLOGICAL_PROCESS | 5.52E-06 |
| [UNDER] | GO:0043043 | peptide biosynthetic process                               | BIOLOGICAL_PROCESS | 5.52E-06 |
| [UNDER] | GO:0022613 | ribonucleoprotein complex biogenesis                       | BIOLOGICAL_PROCESS | 5.59E-06 |
| [UNDER] | GO:0043604 | amide biosynthetic process                                 | BIOLOGICAL_PROCESS | 6.67E-06 |
| [UNDER] | GO:0006412 | translation                                                | BIOLOGICAL_PROCESS | 1.26E-05 |
| [UNDER] | GO:0065009 | regulation of molecular function                           | BIOLOGICAL_PROCESS | 1.81E-05 |
| [UNDER] | GO:0010629 | negative regulation of gene expression                     | BIOLOGICAL_PROCESS | 1.81E-05 |
| [UNDER] | GO:0051128 | regulation of cellular component organization              | BIOLOGICAL_PROCESS | 2.18E-05 |
| [UNDER] | GO:0042886 | amide transport                                            | BIOLOGICAL_PROCESS | 4.15E-05 |
| [UNDER] | GO:0043603 | cellular amide metabolic process                           | BIOLOGICAL_PROCESS | 4.40E-05 |
| [UNDER] | GO:0009892 | negative regulation of metabolic process                   | BIOLOGICAL_PROCESS | 5.62E-05 |
| [UNDER] | GO:0045184 | establishment of protein localization                      | BIOLOGICAL_PROCESS | 5.90E-05 |
| [UNDER] | GO:0015833 | peptide transport                                          | BIOLOGICAL_PROCESS | 5.90E-05 |
| [UNDER] | GO:0006886 | intracellular protein transport                            | BIOLOGICAL_PROCESS | 8.02E-05 |
| [UNDER] | GO:0033043 | regulation of organelle organization                       | BIOLOGICAL_PROCESS | 8.54E-05 |
| [UNDER] | GO:0034470 | ncRNA processing                                           | BIOLOGICAL_PROCESS | 8.67E-05 |
| [UNDER] | GO:0051649 | establishment of localization in cell                      | BIOLOGICAL_PROCESS | 1.11E-04 |
| [UNDER] | GO:0015031 | protein transport                                          | BIOLOGICAL_PROCESS | 1.13E-04 |
| [UNDER] | GO:0031328 | positive regulation of cellular biosynthetic process       | BIOLOGICAL_PROCESS | 1.18E-04 |
| [UNDER] | GO:0009891 | positive regulation of biosynthetic process                | BIOLOGICAL_PROCESS | 1.18E-04 |
| [UNDER] | GO:0010605 | negative regulation of macromolecule metabolic process     | BIOLOGICAL_PROCESS | 1.57E-04 |
| [UNDER] | GO:0051726 | regulation of cell cycle                                   | BIOLOGICAL_PROCESS | 1.78E-04 |

Yow et al., **Genome Sequence of *Monilinia vaccinii-corymbosi* Sheds Light on Mummy Berry Disease Infection of Blueberry and Mating Type**

| Tags    | GO ID      | GO Name                                                                 | GO Category        | FDR         |
|---------|------------|-------------------------------------------------------------------------|--------------------|-------------|
| [UNDER] | GO:0031327 | negative regulation of cellular biosynthetic process                    | BIOLOGICAL_PROCESS | 1.85E-04    |
| [UNDER] | GO:0009890 | negative regulation of biosynthetic process                             | BIOLOGICAL_PROCESS | 1.85E-04    |
| [UNDER] | GO:0050896 | response to stimulus                                                    | BIOLOGICAL_PROCESS | 2.07E-04    |
| [UNDER] | GO:0044281 | small molecule metabolic process                                        | BIOLOGICAL_PROCESS | 2.07E-04    |
| [UNDER] | GO:0065008 | regulation of biological quality                                        | BIOLOGICAL_PROCESS | 2.09E-04    |
| [UNDER] | GO:0042254 | ribosome biogenesis                                                     | BIOLOGICAL_PROCESS | 2.64E-04    |
| [UNDER] | GO:0016192 | vesicle-mediated transport                                              | BIOLOGICAL_PROCESS | 2.73E-04    |
| [UNDER] | GO:0022607 | cellular component assembly                                             | BIOLOGICAL_PROCESS | 2.80E-04    |
| [UNDER] | GO:0006796 | phosphate-containing compound metabolic process                         | BIOLOGICAL_PROCESS | 2.85E-04    |
| [UNDER] | GO:0043436 | oxoacid metabolic process                                               | BIOLOGICAL_PROCESS | 3.16E-04    |
| [UNDER] | GO:0006082 | organic acid metabolic process                                          | BIOLOGICAL_PROCESS | 3.29E-04    |
| [UNDER] | GO:0050790 | regulation of catalytic activity                                        | BIOLOGICAL_PROCESS | 3.70E-04    |
| [UNDER] | GO:2000113 | negative regulation of cellular macromolecule biosynthetic process      | BIOLOGICAL_PROCESS | 3.70E-04    |
| [UNDER] | GO:0016071 | mRNA metabolic process                                                  | BIOLOGICAL_PROCESS | 3.70E-04    |
| [UNDER] | GO:0045935 | positive regulation of nucleobase-containing compound metabolic process | BIOLOGICAL_PROCESS | 3.70E-04    |
| [UNDER] | GO:0045934 | negative regulation of nucleobase-containing compound metabolic process | BIOLOGICAL_PROCESS | 3.70E-04    |
| [UNDER] | GO:0010557 | positive regulation of macromolecule biosynthetic process               | BIOLOGICAL_PROCESS | 3.74E-04    |
| [UNDER] | GO:0010558 | negative regulation of macromolecule biosynthetic process               | BIOLOGICAL_PROCESS | 3.79E-04    |
| [UNDER] | GO:0006793 | phosphorus metabolic process                                            | BIOLOGICAL_PROCESS | 5.20E-04    |
| [UNDER] | GO:0035556 | intracellular signal transduction                                       | BIOLOGICAL_PROCESS | 5.24E-04    |
| [UNDER] | GO:0048285 | organelle fission                                                       | BIOLOGICAL_PROCESS | 5.35E-04    |
| [UNDER] | GO:0010628 | positive regulation of gene expression                                  | BIOLOGICAL_PROCESS | 5.69E-04    |
| [UNDER] | GO:0019752 | carboxylic acid metabolic process                                       | BIOLOGICAL_PROCESS | 6.33E-04    |
| [UNDER] | GO:0000280 | nuclear division                                                        | BIOLOGICAL_PROCESS | 7.94E-04    |
| [UNDER] | GO:0006281 | DNA repair                                                              | BIOLOGICAL_PROCESS | 7.94E-04    |
| [UNDER] | GO:0033365 | protein localization to organelle                                       | BIOLOGICAL_PROCESS | 8.39E-04    |
| [UNDER] | GO:0051253 | negative regulation of RNA metabolic process                            | BIOLOGICAL_PROCESS | 0.001108048 |
| [UNDER] | GO:0010564 | regulation of cell cycle process                                        | BIOLOGICAL_PROCESS | 0.001108048 |
| [UNDER] | GO:0051254 | positive regulation of RNA metabolic process                            | BIOLOGICAL_PROCESS | 0.001138644 |
| [UNDER] | GO:0031324 | negative regulation of cellular metabolic process                       | BIOLOGICAL_PROCESS | 0.001300044 |

Yow et al., *Genome Sequence of Monilinia vaccinii-corymbosi* Sheds Light on Mummy Berry Disease Infection of Blueberry and Mating Type

| Tags    | GO ID      | GO Name                                                      | GO Category        | FDR         |
|---------|------------|--------------------------------------------------------------|--------------------|-------------|
| [UNDER] | GO:1903507 | negative regulation of nucleic acid-templated transcription  | BIOLOGICAL_PROCESS | 0.001607891 |
| [UNDER] | GO:1903508 | positive regulation of nucleic acid-templated transcription  | BIOLOGICAL_PROCESS | 0.001607891 |
| [UNDER] | GO:1902679 | negative regulation of RNA biosynthetic process              | BIOLOGICAL_PROCESS | 0.001607891 |
| [UNDER] | GO:1902680 | positive regulation of RNA biosynthetic process              | BIOLOGICAL_PROCESS | 0.001607891 |
| [UNDER] | GO:0045892 | negative regulation of transcription, DNA-templated          | BIOLOGICAL_PROCESS | 0.001607891 |
| [UNDER] | GO:0006974 | cellular response to DNA damage stimulus                     | BIOLOGICAL_PROCESS | 0.00163032  |
| [UNDER] | GO:0051716 | cellular response to stimulus                                | BIOLOGICAL_PROCESS | 0.001811095 |
| [UNDER] | GO:0072594 | establishment of protein localization to organelle           | BIOLOGICAL_PROCESS | 0.002214484 |
| [UNDER] | GO:0045893 | positive regulation of transcription, DNA-templated          | BIOLOGICAL_PROCESS | 0.002214484 |
| [UNDER] | GO:0016072 | rRNA metabolic process                                       | BIOLOGICAL_PROCESS | 0.002315881 |
| [UNDER] | GO:0051172 | negative regulation of nitrogen compound metabolic process   | BIOLOGICAL_PROCESS | 0.002418381 |
| [UNDER] | GO:0006325 | chromatin organization                                       | BIOLOGICAL_PROCESS | 0.003109595 |
| [UNDER] | GO:0006811 | ion transport                                                | BIOLOGICAL_PROCESS | 0.003312314 |
| [UNDER] | GO:0006468 | protein phosphorylation                                      | BIOLOGICAL_PROCESS | 0.003367796 |
| [UNDER] | GO:0044283 | small molecule biosynthetic process                          | BIOLOGICAL_PROCESS | 0.003367796 |
| [UNDER] | GO:0007059 | chromosome segregation                                       | BIOLOGICAL_PROCESS | 0.004713985 |
| [UNDER] | GO:0006364 | rRNA processing                                              | BIOLOGICAL_PROCESS | 0.004713985 |
| [UNDER] | GO:0051246 | regulation of protein metabolic process                      | BIOLOGICAL_PROCESS | 0.004765366 |
| [UNDER] | GO:0044770 | cell cycle phase transition                                  | BIOLOGICAL_PROCESS | 0.006824561 |
| [UNDER] | GO:0045944 | positive regulation of transcription by RNA polymerase II    | BIOLOGICAL_PROCESS | 0.006824561 |
| [UNDER] | GO:0032268 | regulation of cellular protein metabolic process             | BIOLOGICAL_PROCESS | 0.006824561 |
| [UNDER] | GO:0070647 | protein modification by small protein conjugation or removal | BIOLOGICAL_PROCESS | 0.006824561 |
| [UNDER] | GO:0023052 | signaling                                                    | BIOLOGICAL_PROCESS | 0.007115669 |
| [UNDER] | GO:0007346 | regulation of mitotic cell cycle                             | BIOLOGICAL_PROCESS | 0.007401468 |
| [UNDER] | GO:0006397 | mRNA processing                                              | BIOLOGICAL_PROCESS | 0.00992434  |
| [UNDER] | GO:0090305 | nucleic acid phosphodiester bond hydrolysis                  | BIOLOGICAL_PROCESS | 0.00992434  |
| [UNDER] | GO:0044093 | positive regulation of molecular function                    | BIOLOGICAL_PROCESS | 0.00992434  |
| [UNDER] | GO:0140014 | mitotic nuclear division                                     | BIOLOGICAL_PROCESS | 0.00992434  |
| [OVER]  | GO:0005975 | carbohydrate metabolic process                               | BIOLOGICAL_PROCESS | 1.00E-175   |
| [OVER]  | GO:0005976 | polysaccharide metabolic process                             | BIOLOGICAL_PROCESS | 9.43E-94    |

Yow et al., *Genome Sequence of Monilinia vaccinii-corymbosi* Sheds Light on Mummy Berry Disease Infection of Blueberry and Mating Type

| Tags   | GO ID      | GO Name                                               | GO Category        | FDR      |
|--------|------------|-------------------------------------------------------|--------------------|----------|
| [OVER] | GO:0000272 | polysaccharide catabolic process                      | BIOLOGICAL_PROCESS | 2.16E-68 |
| [OVER] | GO:0016052 | carbohydrate catabolic process                        | BIOLOGICAL_PROCESS | 9.13E-68 |
| [OVER] | GO:0044264 | cellular polysaccharide metabolic process             | BIOLOGICAL_PROCESS | 1.23E-60 |
| [OVER] | GO:0044262 | cellular carbohydrate metabolic process               | BIOLOGICAL_PROCESS | 1.89E-50 |
| [OVER] | GO:0071554 | cell wall organization or biogenesis                  | BIOLOGICAL_PROCESS | 7.21E-44 |
| [OVER] | GO:0044036 | cell wall macromolecule metabolic process             | BIOLOGICAL_PROCESS | 1.19E-43 |
| [OVER] | GO:0070085 | glycosylation                                         | BIOLOGICAL_PROCESS | 1.62E-39 |
| [OVER] | GO:0044042 | glucan metabolic process                              | BIOLOGICAL_PROCESS | 3.37E-37 |
| [OVER] | GO:0009100 | glycoprotein metabolic process                        | BIOLOGICAL_PROCESS | 3.74E-36 |
| [OVER] | GO:0010383 | cell wall polysaccharide metabolic process            | BIOLOGICAL_PROCESS | 4.11E-34 |
| [OVER] | GO:0006073 | cellular glucan metabolic process                     | BIOLOGICAL_PROCESS | 1.15E-33 |
| [OVER] | GO:0097502 | mannosylation                                         | BIOLOGICAL_PROCESS | 1.21E-32 |
| [OVER] | GO:0009101 | glycoprotein biosynthetic process                     | BIOLOGICAL_PROCESS | 7.64E-29 |
| [OVER] | GO:0043413 | macromolecule glycosylation                           | BIOLOGICAL_PROCESS | 2.95E-28 |
| [OVER] | GO:0006486 | protein glycosylation                                 | BIOLOGICAL_PROCESS | 2.95E-28 |
| [OVER] | GO:1901135 | carbohydrate derivative metabolic process             | BIOLOGICAL_PROCESS | 9.81E-28 |
| [OVER] | GO:0009251 | glucan catabolic process                              | BIOLOGICAL_PROCESS | 8.56E-27 |
| [OVER] | GO:0045229 | external encapsulating structure organization         | BIOLOGICAL_PROCESS | 1.89E-25 |
| [OVER] | GO:0008152 | metabolic process                                     | BIOLOGICAL_PROCESS | 2.01E-25 |
| [OVER] | GO:0071555 | cell wall organization                                | BIOLOGICAL_PROCESS | 1.14E-24 |
| [OVER] | GO:0051273 | beta-glucan metabolic process                         | BIOLOGICAL_PROCESS | 3.58E-23 |
| [OVER] | GO:0044247 | cellular polysaccharide catabolic process             | BIOLOGICAL_PROCESS | 8.34E-23 |
| [OVER] | GO:0044275 | cellular carbohydrate catabolic process               | BIOLOGICAL_PROCESS | 4.12E-22 |
| [OVER] | GO:0044238 | primary metabolic process                             | BIOLOGICAL_PROCESS | 8.40E-22 |
| [OVER] | GO:0042546 | cell wall biogenesis                                  | BIOLOGICAL_PROCESS | 8.48E-22 |
| [OVER] | GO:1901575 | organic substance catabolic process                   | BIOLOGICAL_PROCESS | 1.22E-21 |
| [OVER] | GO:0044038 | cell wall macromolecule biosynthetic process          | BIOLOGICAL_PROCESS | 1.64E-21 |
| [OVER] | GO:0070589 | cellular component macromolecule biosynthetic process | BIOLOGICAL_PROCESS | 1.64E-21 |
| [OVER] | GO:0006487 | protein N-linked glycosylation                        | BIOLOGICAL_PROCESS | 1.82E-21 |
| [OVER] | GO:0071852 | fungal-type cell wall organization or biogenesis      | BIOLOGICAL_PROCESS | 1.26E-20 |



Yow et al., *Genome Sequence of Monilinia vaccinii-corymbosi* Sheds Light on Mummy Berry Disease Infection of Blueberry and Mating Type

| Tags   | GO ID      | GO Name                                                 | GO Category        | FDR      |
|--------|------------|---------------------------------------------------------|--------------------|----------|
| [OVER] | GO:1901137 | carbohydrate derivative biosynthetic process            | BIOLOGICAL_PROCESS | 2.60E-20 |
| [OVER] | GO:0071704 | organic substance metabolic process                     | BIOLOGICAL_PROCESS | 1.21E-19 |
| [OVER] | GO:0034637 | cellular carbohydrate biosynthetic process              | BIOLOGICAL_PROCESS | 3.52E-19 |
| [OVER] | GO:0009057 | macromolecule catabolic process                         | BIOLOGICAL_PROCESS | 5.12E-19 |
| [OVER] | GO:0033692 | cellular polysaccharide biosynthetic process            | BIOLOGICAL_PROCESS | 1.01E-18 |
| [OVER] | GO:0010393 | galacturonan metabolic process                          | BIOLOGICAL_PROCESS | 1.28E-18 |
| [OVER] | GO:0045488 | pectin metabolic process                                | BIOLOGICAL_PROCESS | 1.28E-18 |
| [OVER] | GO:0045490 | pectin catabolic process                                | BIOLOGICAL_PROCESS | 1.28E-18 |
| [OVER] | GO:0000271 | polysaccharide biosynthetic process                     | BIOLOGICAL_PROCESS | 2.89E-18 |
| [OVER] | GO:0009056 | catabolic process                                       | BIOLOGICAL_PROCESS | 1.66E-17 |
| [OVER] | GO:0071966 | fungus-type cell wall polysaccharide metabolic process  | BIOLOGICAL_PROCESS | 3.30E-15 |
| [OVER] | GO:0031505 | fungus-type cell wall organization                      | BIOLOGICAL_PROCESS | 3.88E-15 |
| [OVER] | GO:0016051 | carbohydrate biosynthetic process                       | BIOLOGICAL_PROCESS | 4.33E-14 |
| [OVER] | GO:0051275 | beta-glucan catabolic process                           | BIOLOGICAL_PROCESS | 3.53E-13 |
| [OVER] | GO:0070592 | cell wall polysaccharide biosynthetic process           | BIOLOGICAL_PROCESS | 1.36E-12 |
| [OVER] | GO:0070879 | fungus-type cell wall beta-glucan metabolic process     | BIOLOGICAL_PROCESS | 5.34E-12 |
| [OVER] | GO:0042737 | drug catabolic process                                  | BIOLOGICAL_PROCESS | 6.34E-11 |
| [OVER] | GO:0009250 | glucan biosynthetic process                             | BIOLOGICAL_PROCESS | 7.88E-11 |
| [OVER] | GO:0030243 | cellulose metabolic process                             | BIOLOGICAL_PROCESS | 1.57E-10 |
| [OVER] | GO:0030245 | cellulose catabolic process                             | BIOLOGICAL_PROCESS | 1.57E-10 |
| [OVER] | GO:0044347 | cell wall polysaccharide catabolic process              | BIOLOGICAL_PROCESS | 1.57E-10 |
| [OVER] | GO:0006491 | N-glycan processing                                     | BIOLOGICAL_PROCESS | 1.58E-10 |
| [OVER] | GO:0034406 | cell wall beta-glucan metabolic process                 | BIOLOGICAL_PROCESS | 1.86E-10 |
| [OVER] | GO:0009311 | oligosaccharide metabolic process                       | BIOLOGICAL_PROCESS | 2.14E-10 |
| [OVER] | GO:1901071 | glucosamine-containing compound metabolic process       | BIOLOGICAL_PROCESS | 3.86E-10 |
| [OVER] | GO:0016998 | cell wall macromolecule catabolic process               | BIOLOGICAL_PROCESS | 7.67E-10 |
| [OVER] | GO:0006490 | oligosaccharide-lipid intermediate biosynthetic process | BIOLOGICAL_PROCESS | 1.37E-09 |
| [OVER] | GO:0006030 | chitin metabolic process                                | BIOLOGICAL_PROCESS | 2.47E-09 |
| [OVER] | GO:0035268 | protein mannosylation                                   | BIOLOGICAL_PROCESS | 2.76E-09 |
| [OVER] | GO:0006040 | amino sugar metabolic process                           | BIOLOGICAL_PROCESS | 4.97E-09 |



Yow et al., *Genome Sequence of Monilinia vaccinii-corymbosi* Sheds Light on Mummy Berry Disease Infection of Blueberry and Mating Type

| Tags   | GO ID      | GO Name                                                                        | GO Category        | FDR      |
|--------|------------|--------------------------------------------------------------------------------|--------------------|----------|
| [OVER] | GO:0009272 | fungus-type cell wall biogenesis                                               | BIOLOGICAL_PROCESS | 7.32E-09 |
| [OVER] | GO:0031506 | cell wall glycoprotein biosynthetic process                                    | BIOLOGICAL_PROCESS | 8.19E-09 |
| [OVER] | GO:0000032 | cell wall mannoprotein biosynthetic process                                    | BIOLOGICAL_PROCESS | 8.19E-09 |
| [OVER] | GO:0006057 | mannoprotein biosynthetic process                                              | BIOLOGICAL_PROCESS | 8.19E-09 |
| [OVER] | GO:0006056 | mannoprotein metabolic process                                                 | BIOLOGICAL_PROCESS | 8.19E-09 |
| [OVER] | GO:0044277 | cell wall disassembly                                                          | BIOLOGICAL_PROCESS | 8.81E-09 |
| [OVER] | GO:0071853 | fungus-type cell wall disassembly                                              | BIOLOGICAL_PROCESS | 8.81E-09 |
| [OVER] | GO:0006022 | aminoglycan metabolic process                                                  | BIOLOGICAL_PROCESS | 1.60E-08 |
| [OVER] | GO:0006488 | dolichol-linked oligosaccharide biosynthetic process                           | BIOLOGICAL_PROCESS | 2.08E-08 |
| [OVER] | GO:1901136 | carbohydrate derivative catabolic process                                      | BIOLOGICAL_PROCESS | 7.00E-08 |
| [OVER] | GO:0010412 | mannan metabolic process                                                       | BIOLOGICAL_PROCESS | 1.94E-07 |
| [OVER] | GO:0006037 | cell wall chitin metabolic process                                             | BIOLOGICAL_PROCESS | 1.98E-07 |
| [OVER] | GO:0070880 | fungus-type cell wall beta-glucan biosynthetic process                         | BIOLOGICAL_PROCESS | 3.02E-07 |
| [OVER] | GO:0051274 | beta-glucan biosynthetic process                                               | BIOLOGICAL_PROCESS | 7.45E-07 |
| [OVER] | GO:0005984 | disaccharide metabolic process                                                 | BIOLOGICAL_PROCESS | 1.13E-06 |
| [OVER] | GO:0010410 | hemicellulose metabolic process                                                | BIOLOGICAL_PROCESS | 1.18E-06 |
| [OVER] | GO:0051278 | fungus-type cell wall polysaccharide biosynthetic process                      | BIOLOGICAL_PROCESS | 1.83E-06 |
| [OVER] | GO:0009313 | oligosaccharide catabolic process                                              | BIOLOGICAL_PROCESS | 1.86E-06 |
| [OVER] | GO:0034410 | cell wall beta-glucan biosynthetic process                                     | BIOLOGICAL_PROCESS | 4.17E-06 |
| [OVER] | GO:0070871 | cell wall organization involved in conjugation with cellular fusion            | BIOLOGICAL_PROCESS | 4.17E-06 |
| [OVER] | GO:1904541 | fungus-type cell wall disassembly involved in conjugation with cellular fusion | BIOLOGICAL_PROCESS | 4.17E-06 |
| [OVER] | GO:0006493 | protein O-linked glycosylation                                                 | BIOLOGICAL_PROCESS | 8.31E-06 |
| [OVER] | GO:0044248 | cellular catabolic process                                                     | BIOLOGICAL_PROCESS | 1.02E-05 |
| [OVER] | GO:0006074 | (1->3)-beta-D-glucan metabolic process                                         | BIOLOGICAL_PROCESS | 1.57E-05 |
| [OVER] | GO:1901072 | glucosamine-containing compound catabolic process                              | BIOLOGICAL_PROCESS | 2.70E-05 |
| [OVER] | GO:0046348 | amino sugar catabolic process                                                  | BIOLOGICAL_PROCESS | 2.70E-05 |
| [OVER] | GO:0046352 | disaccharide catabolic process                                                 | BIOLOGICAL_PROCESS | 2.70E-05 |
| [OVER] | GO:0006664 | glycolipid metabolic process                                                   | BIOLOGICAL_PROCESS | 4.50E-05 |
| [OVER] | GO:1903509 | liposaccharide metabolic process                                               | BIOLOGICAL_PROCESS | 4.50E-05 |

Yow et al., **Genome Sequence of *Monilinia vaccinii-corymbosi* Sheds Light on Mummy Berry Disease Infection of Blueberry and Mating Type**

| Tags   | GO ID      | GO Name                                                         | GO Category        | FDR         |
|--------|------------|-----------------------------------------------------------------|--------------------|-------------|
| [OVER] | GO:0071970 | fungus-type cell wall (1->3)-beta-D-glucan biosynthetic process | BIOLOGICAL_PROCESS | 7.14E-05    |
| [OVER] | GO:0071969 | fungus-type cell wall (1->3)-beta-D-glucan metabolic process    | BIOLOGICAL_PROCESS | 7.14E-05    |
| [OVER] | GO:0090605 | submerged biofilm formation                                     | BIOLOGICAL_PROCESS | 8.54E-05    |
| [OVER] | GO:0009269 | response to desiccation                                         | BIOLOGICAL_PROCESS | 8.67E-05    |
| [OVER] | GO:0046354 | mannan biosynthetic process                                     | BIOLOGICAL_PROCESS | 8.67E-05    |
| [OVER] | GO:0042631 | cellular response to water deprivation                          | BIOLOGICAL_PROCESS | 8.67E-05    |
| [OVER] | GO:0071465 | cellular response to desiccation                                | BIOLOGICAL_PROCESS | 8.67E-05    |
| [OVER] | GO:0071462 | cellular response to water stimulus                             | BIOLOGICAL_PROCESS | 8.67E-05    |
| [OVER] | GO:0009415 | response to water                                               | BIOLOGICAL_PROCESS | 8.67E-05    |
| [OVER] | GO:0009414 | response to water deprivation                                   | BIOLOGICAL_PROCESS | 8.67E-05    |
| [OVER] | GO:0005977 | glycogen metabolic process                                      | BIOLOGICAL_PROCESS | 1.12E-04    |
| [OVER] | GO:0042710 | biofilm formation                                               | BIOLOGICAL_PROCESS | 1.54E-04    |
| [OVER] | GO:0017144 | drug metabolic process                                          | BIOLOGICAL_PROCESS | 2.14E-04    |
| [OVER] | GO:0005991 | trehalose metabolic process                                     | BIOLOGICAL_PROCESS | 2.73E-04    |
| [OVER] | GO:0006112 | energy reserve metabolic process                                | BIOLOGICAL_PROCESS | 2.73E-04    |
| [OVER] | GO:0042545 | cell wall modification                                          | BIOLOGICAL_PROCESS | 3.70E-04    |
| [OVER] | GO:0045493 | xylan catabolic process                                         | BIOLOGICAL_PROCESS | 3.70E-04    |
| [OVER] | GO:0045491 | xylan metabolic process                                         | BIOLOGICAL_PROCESS | 3.70E-04    |
| [OVER] | GO:0006026 | aminoglycan catabolic process                                   | BIOLOGICAL_PROCESS | 3.70E-04    |
| [OVER] | GO:0006032 | chitin catabolic process                                        | BIOLOGICAL_PROCESS | 3.70E-04    |
| [OVER] | GO:0009247 | glycolipid biosynthetic process                                 | BIOLOGICAL_PROCESS | 4.61E-04    |
| [OVER] | GO:0090609 | single-species submerged biofilm formation                      | BIOLOGICAL_PROCESS | 5.92E-04    |
| [OVER] | GO:0044010 | single-species biofilm formation                                | BIOLOGICAL_PROCESS | 0.001037668 |
| [OVER] | GO:0006687 | glycosphingolipid metabolic process                             | BIOLOGICAL_PROCESS | 0.001618843 |
| [OVER] | GO:0034411 | cell wall (1->3)-beta-D-glucan biosynthetic process             | BIOLOGICAL_PROCESS | 0.001618843 |
| [OVER] | GO:0034407 | cell wall (1->3)-beta-D-glucan metabolic process                | BIOLOGICAL_PROCESS | 0.001618843 |
| [OVER] | GO:0006075 | (1->3)-beta-D-glucan biosynthetic process                       | BIOLOGICAL_PROCESS | 0.001618843 |
| [OVER] | GO:0030259 | lipid glycosylation                                             | BIOLOGICAL_PROCESS | 0.001639325 |
| [OVER] | GO:0016137 | glycoside metabolic process                                     | BIOLOGICAL_PROCESS | 0.001639325 |
| [OVER] | GO:0016139 | glycoside catabolic process                                     | BIOLOGICAL_PROCESS | 0.001639325 |

Yow et al., **Genome Sequence of *Monilinia vaccinii-corymbosi* Sheds Light on Mummy Berry Disease Infection of Blueberry and Mating Type**

| Tags   | GO ID      | GO Name                                                 | GO Category        | FDR         |
|--------|------------|---------------------------------------------------------|--------------------|-------------|
| [OVER] | GO:0000918 | division septum site selection                          | BIOLOGICAL_PROCESS | 0.001639325 |
| [OVER] | GO:0046379 | extracellular polysaccharide metabolic process          | BIOLOGICAL_PROCESS | 0.001639325 |
| [OVER] | GO:0031221 | arabinan metabolic process                              | BIOLOGICAL_PROCESS | 0.001639325 |
| [OVER] | GO:0036503 | ERAD pathway                                            | BIOLOGICAL_PROCESS | 0.001930135 |
| [OVER] | GO:0035269 | protein O-linked mannosylation                          | BIOLOGICAL_PROCESS | 0.001980602 |
| [OVER] | GO:0071712 | ER-associated misfolded protein catabolic process       | BIOLOGICAL_PROCESS | 0.001980602 |
| [OVER] | GO:0005980 | glycogen catabolic process                              | BIOLOGICAL_PROCESS | 0.001980602 |
| [OVER] | GO:0018196 | peptidyl-asparagine modification                        | BIOLOGICAL_PROCESS | 0.001980602 |
| [OVER] | GO:0018279 | protein N-linked glycosylation via asparagine           | BIOLOGICAL_PROCESS | 0.001980602 |
| [OVER] | GO:0044011 | single-species biofilm formation on inanimate substrate | BIOLOGICAL_PROCESS | 0.002214484 |
| [OVER] | GO:0051703 | intraspecies interaction between organisms              | BIOLOGICAL_PROCESS | 0.002214484 |
| [OVER] | GO:0005978 | glycogen biosynthetic process                           | BIOLOGICAL_PROCESS | 0.002328269 |
| [OVER] | GO:0006643 | membrane lipid metabolic process                        | BIOLOGICAL_PROCESS | 0.003367796 |
| [OVER] | GO:0022610 | biological adhesion                                     | BIOLOGICAL_PROCESS | 0.003911006 |
| [OVER] | GO:0031589 | cell-substrate adhesion                                 | BIOLOGICAL_PROCESS | 0.004895195 |
| [OVER] | GO:0046373 | L-arabinose metabolic process                           | BIOLOGICAL_PROCESS | 0.005831702 |
| [OVER] | GO:0070413 | trehalose metabolism in response to stress              | BIOLOGICAL_PROCESS | 0.005831702 |
| [OVER] | GO:0043170 | macromolecule metabolic process                         | BIOLOGICAL_PROCESS | 0.008357138 |
| [OVER] | GO:0044419 | interspecies interaction between organisms              | BIOLOGICAL_PROCESS | 0.009268417 |
| [OVER] | GO:0046467 | membrane lipid biosynthetic process                     | BIOLOGICAL_PROCESS | 0.009660083 |
| [OVER] | GO:0043934 | sporulation                                             | BIOLOGICAL_PROCESS | 0.00992434  |

Yow et al., **Genome Sequence of *Monilinia vaccinii-corymbosi* Sheds Light on Mummy Berry Disease Infection of Blueberry and Mating Type**

TABLE S9. Secondary metabolite biosynthesis backbone genes identified in *Monilinia vaccinii-corymbosi* by SMURF.

| Backbone Gene ID | Gene Description                                     | Chromosome | Cluster | SMURF Backbone Gene |
|------------------|------------------------------------------------------|------------|---------|---------------------|
| ASPCAL07647      | polyketide synthase, putative                        | 2          | None    | PKS-Like            |
| BCON_0348g00080  | putative nonribosomal peptide synthase -like protein | 4          | 1       | NRPS                |
| BELL_0182g00140  | NRPS-like enzyme                                     | 1          | 2       | NRPS-Like           |
| BGAL_0051g00170  | BcPKS16, polyketide synthase                         | 9          | 3       | PKS                 |
| BHYA_0070g00460  | putative hc-toxin synthetase protein                 | 2          | 4       | NRPS-Like           |
| BO71DRAFT_436033 | polyketide synthase                                  | 7          | 5       | PKS                 |
| BP6252_13184     | non-ribosomal peptide synthetase                     | 8          | 6       | NRPS                |
| BPOR_0045g00020  | nonribosomal peptide synthase SidD                   | 1          | 7       | NRPS                |
| BTUL_0024g00210  | nonribosomal peptide synthetase                      | 4          | None    | NRPS                |
| BTUL_0098g00380  | BcPKS12, polyketide synthase                         | 2          | 8       | PKS                 |
| BTUL_0198g00060  | 3-oxoacyl-[acyl-carrier-protein] synthase            | 1          | None    | PKS-Like            |
| BcDW1_3470       | nonribosomal peptide synthetase                      | 1          | None    | NRPS                |
| BcDW1_4610       | putative hybrid pks-nrps protein                     | 3          | 13      | PKS                 |
| Bcpks8           | BcPKS8, polyketide synthase                          | 4          | 9       | PKS                 |
| MAA_01626        | polyketide synthase 3                                | 1          | None    | HYBRID              |
| PEX2_074870      | Acyl transferase/acyl hydrolase/lysophospholipase    | 7          | 10      | PKS                 |
| S40285_06294     | Reducing polyketide synthase                         | 6          | 11      | PKS                 |
| SS1G_02020       | putative alpha-1,2-mannosidase family protein        | 4          | 12      | NRPS-Like           |
| SS1G_09240       | putative polyketide synthase protein                 | 3          | 13      | PKS                 |
| SS1G_13322       | polyketide synthase                                  | 6          | None    | PKS                 |
| TCE0_044f16394   | putative polyketide synthase                         | 1          | 14      | PKS                 |
| perA             | peramine synthetase                                  | 1          | 15      | NRPS-Like           |
| sscle_08g064270  | NRPS-like enzyme                                     | 7          | None    | NRPS-Like           |

Yow et al., **Genome Sequence of *Monilinia vaccinii-corymbosi* Sheds Light on Mummy Berry Disease Infection of Blueberry and Mating Type**

TABLE S10. Secondary metabolite biosynthesis clusters identified in *Monilinia vaccinii-corymbosi* by SMURF.

| Gene ID*          | Gene Positions | Chromosome | Gene Order | Domain Score | Gene Description                                      |
|-------------------|----------------|------------|------------|--------------|-------------------------------------------------------|
| <b>Cluster:1</b>  |                |            |            |              |                                                       |
| BCON_0348g00040   | -3             | 4          | 668        | 1            | putative cytochrome p450 oxidoreductase protein       |
| BCON_0348g00050   | -2             | 4          | 667        | 1            | hypothetical protein DID88_003153                     |
| SBOR_3743         | -1             | 4          | 666        | 1            | hypothetical protein EYC84_000427                     |
| BCON_0348g00080   | 0              | 4          | 665        | 0            | putative nonribosomal peptide synthase-like protein   |
| SBOR_3701         | 1              | 4          | 664        | 0            | thiamin pyrophosphokinase-related protein             |
| BCIN_12g04840     | 2              | 4          | 663        | 0            | predicted protein                                     |
| BCIN_12g04850     | 3              | 4          | 662        | 0            | putative integral membrane channel protein            |
| BPOR_0275g00110   | 4              | 4          | 661        | 0            | putative bifunctional pyrimidine biosynthesis protein |
| BofuT4P0000074001 | 5              | 4          | 660        | 1            | putative mfs multidrug transporter protein            |
| BPAE_0050g00100   | 6              | 4          | 659        | 0            | hypothetical protein EYC84_000432                     |
| BPOR_0019g00140   | 7              | 4          | 658        | 1            | putative maltose permease protein                     |
| BGAL_0396g00020   | 8              | 4          | 657        | 1            | putative salicylate protein                           |
| <b>Cluster:2</b>  |                |            |            |              |                                                       |
| BofuT4_P012380.1  | -2             | 1          | 57         | 1            | Zn(II)2Cys6 transcription factor                      |
| BTUL_0046g00590   | -1             | 1          | 56         | 0            | Zn(II)2Cys6 transcription factor                      |
| BELL_0182g00140   | 0              | 1          | 55         | 0            | NRPS-like enzyme                                      |
| BofuT4_P012420.1  | 1              | 1          | 54         | 1            | putative mfs transporter protein                      |
| <b>Cluster:3</b>  |                |            |            |              |                                                       |
| BcDW1_10428       | -1             | 9          | 275        | 1            | putative polyketide synthase protein                  |
| BGAL_0051g00170   | 0              | 9          | 274        | 0            | BcPKS16, polyketide synthase                          |
| BHYA_0044g00180   | 1              | 9          | 273        | 0            | hypothetical protein SBOR_8148                        |
| BPOR_0073g00150   | 2              | 9          | 272        | 1            | cytochrome P450 monooxygenase                         |
| <b>Cluster:4</b>  |                |            |            |              |                                                       |
| BGAL_0140g00060   | -3             | 2          | 929        | 1            | putative mfs transporter protein                      |
| SS1G_10565        | -2             | 2          | 928        | 1            | alcohol dehydrogenase                                 |
| BCIN_04g01380     | -1             | 2          | 927        | 0            | putative pyrroline-5-carboxylate reductase protein    |
| BHYA_0070g00460   | 0              | 2          | 926        | 0            | putative hc-toxin synthetase protein                  |
| <b>Cluster:5</b>  |                |            |            |              |                                                       |

Yow et al., *Genome Sequence of Monilinia vaccinii-corymbosi* Sheds Light on Mummy Berry Disease Infection of Blueberry and Mating Type

| Gene ID*          | Gene Positions | Chromosome | Gene Order | Domain Score | Gene Description                                                       |
|-------------------|----------------|------------|------------|--------------|------------------------------------------------------------------------|
| CJF30_00009638    | -3             | 7          | 363        | 1            | hexose transporter                                                     |
| SS1G_11401        | -2             | 7          | 362        | 1            | short-chain dehydrogenase, putative                                    |
| BO94DRAFT_532539  | -1             | 7          | 361        | 0            | alpha beta hydrolase fold-3 domain containing protein                  |
| BO71DRAFT_436033  | 0              | 7          | 360        | 0            | polyketide synthase                                                    |
| M426DRAFT_109244  | 1              | 7          | 359        | 0            | L-amino acid amidase                                                   |
| ANO14919_102910   | 2              | 7          | 358        | 0            | hypothetical protein ANO14919_102910                                   |
| DM02DRAFT_478682  | 3              | 7          | 357        | 0            | hypothetical protein M434DRAFT_282681                                  |
| VM1G_04709        | 4              | 7          | 356        | 1            | Choline transport protein                                              |
| <b>Cluster:6</b>  |                |            |            |              |                                                                        |
| SBOR_8377         | -2             | 8          | 63         | 1            | MFS transporter, SIT family, siderophore-iron:H <sup>+</sup> symporter |
| SS1G_11626        | -1             | 8          | 62         | 0            | putative inositol 5-phosphatase protein                                |
| BP6252_13184      | 0              | 8          | 61         | 0            | non-ribosomal peptide synthetase                                       |
| DID88_003025      | 1              | 8          | 60         | 0            | hypothetical protein EYC84_007856                                      |
| SBOR_8381         | 2              | 8          | 59         | 1            | putative ABC bile acid transporter                                     |
| <b>Cluster:7</b>  |                |            |            |              |                                                                        |
| BPOR_0045g00020   | 0              | 1          | 295        | 0            | nonribosomal peptide synthase SidD                                     |
| BELL_0279g00030   | 1              | 1          | 294        | 1            | ABC multidrug transporter SitT                                         |
| <b>Cluster:8</b>  |                |            |            |              |                                                                        |
| smr1              | -1             | 2          | 546        | 1            | transcription factor                                                   |
| BTUL_0098g00380   | 0              | 2          | 545        | 0            | BcPKS12, polyketide synthase                                           |
| <b>Cluster:9</b>  |                |            |            |              |                                                                        |
| sscle_01g004380   | -5             | 4          | 329        | 1            | hypothetical protein sscle_01g004380                                   |
| BofuT4_P118950.1  | -4             | 4          | 328        | 0            | putative glycoside hydrolase family 25 protein                         |
| DID88_005849      | -3             | 4          | 327        | 0            | putative gtp-binding protein gtr1 protein                              |
| BCIN_07g02900     | -2             | 4          | 326        | 1            | putative abc transporter protein                                       |
| SS1G_01999        | -1             | 4          | 325        | 0            | putative ef-hand calcium-binding domain protein                        |
| Bcpks8            | 0              | 4          | 324        | 1            | BcPKS8, polyketide synthase                                            |
| BOTNAR_0001g00750 | 1              | 4          | 323        | 0            | NADPH dehydrogenase                                                    |
| SBOR_5242         | 2              | 4          | 322        | 0            | hypothetical protein EYC80_004819                                      |
| BOTNAR_0100g00210 | 3              | 4          | 321        | 1            | aromatic amino acid aminotransferase                                   |

Yow et al., Genome Sequence of *Monilinia vaccinii-corymbosi* Sheds Light on Mummy Berry Disease Infection of Blueberry and Mating Type

| Gene ID*           | Gene Positions | Chromosome | Gene Order | Domain Score | Gene Description                                       |
|--------------------|----------------|------------|------------|--------------|--------------------------------------------------------|
| <b>Cluster:10</b>  |                |            |            |              |                                                        |
| SBOR_1121          | -3             | 7          | 241        | 1            | MFS multidrug transporter                              |
| BOTCAL_0018g00270  | -2             | 7          | 240        | 0            | peptidyl-tRNA hydrolase PTH2                           |
| BOTNAR_0199g00210  | -1             | 7          | 239        | 0            | hypothetical protein EYC84_001176                      |
| PEX2_074870        | 0              | 7          | 238        | 0            | Acyl transferase/acyl hydrolase/lysophospholipase      |
| <b>Cluster:11</b>  |                |            |            |              |                                                        |
| DL768_004486       | -9             | 6          | 446        | 1            | Flavine halogenase                                     |
| DID88_004562       | -8             | 6          | 445        | 1            | FAD-linked oxidoreductase                              |
| NEUTE2DRAFT_98132  | -7             | 6          | 444        | 1            | FAD-linked oxidoreductase                              |
| DL771_009216       | -6             | 6          | 443        | 0            | NAD(P)-binding protein                                 |
| GE21DRAFT_2377     | -5             | 6          | 442        | 1            | 2,5-dichloro-2,5-cyclohexadiene-1,4-diol dehydrogenase |
| SMU2925            | -4             | 6          | 441        | 1            | FAD/NAD(P)-binding domain-containing protein           |
| PFICI_14519        | -3             | 6          | 440        | 1            | NAD(P)-binding protein                                 |
| BCR38DRAFT_519830  | -2             | 6          | 439        | 0            | Bifunctional epoxide hydrolase                         |
| M419DRAFT_85683    | -1             | 6          | 438        | 1            | short-chain dehydrogenase/reductase                    |
| S40285_06294       | 0              | 6          | 437        | 1            | Reducing polyketide synthase                           |
| <b>Cluster:12</b>  |                |            |            |              |                                                        |
| BGAL_0104g00200    | -5             | 4          | 338        | 1            | putative polyamine acetyltransferase protein           |
| BPOR_0027g00120    | -4             | 4          | 337        | 0            | putative aspartyl protease protein                     |
| BcDW1_3400         | -3             | 4          | 336        | 0            | putative ribosomal rna-processing protein 8 protein    |
| BTUL_0318g00060    | -2             | 4          | 335        | 1            | putative c6 finger domain-containing protein           |
| BofuT4P90000024001 | -1             | 4          | 334        | 0            | putative alpha-1,2-mannosidase family protein          |
| SS1G_02020         | 0              | 4          | 333        | 0            | putative alpha-1,2-mannosidase family protein          |
| <b>Cluster:13</b>  |                |            |            |              |                                                        |
| BPOR_0121g00040    | -6             | 3          | 221        | 1            | Cytochrome P450 monooxygenase BOA3                     |
| BOTNAR_0328g00100  | -5             | 3          | 220        | 1            | cytochrome P450 protein                                |
| BCON_0375g00080    | -4             | 3          | 219        | 0            | putative alcohol dehydrogenase protein                 |
| BcDW1_4610         | -3             | 3          | 218        | 1            | putative hybrid pks-nrps protein                       |
| SS1G_09238         | -2             | 3          | 217        | 0            | putative cytochrome p450 monooxygenase protein         |
| BCON_0375g00050    | -1             | 3          | 216        | 1            | FAD-dependent monooxygenase BOA8                       |

Yow et al., Genome Sequence of *Monilinia vaccinii-corymbosi* Sheds Light on Mummy Berry Disease Infection of Blueberry and Mating Type

| Gene ID*          | Gene Positions | Chromosome | Gene Order | Domain Score | Gene Description                                     |
|-------------------|----------------|------------|------------|--------------|------------------------------------------------------|
| SS1G_09240        | 0              | 3          | 215        | 1            | putative polyketide synthase protein                 |
| CJF31_00004990    | 1              | 3          | 214        | 0            | Probable thioesterase BOA10                          |
| BcDW1_4606        | 2              | 3          | 213        | 1            | putative trichothecene 3-o-acetyltransferase protein |
| <b>Cluster:14</b> |                |            |            |              |                                                      |
| BCIN_05g03610     | -3             | 1          | 1104       | 1            | ABC transporter                                      |
| BofuT4_P041370.1  | -2             | 1          | 1103       | 1            | N-acetyltransferase 9                                |
| BP6252_10650      | -1             | 1          | 1102       | 0            | Adaptor protein-like protein complex AP-2            |
| TCE0_044f16394    | 0              | 1          | 1101       | 0            | putative polyketide synthase                         |
| <b>Cluster:15</b> |                |            |            |              |                                                      |
| CC77DRAFT_23848   | -2             | 1          | 831        | 1            | Aminotriazole resistance                             |
| DL769_002837      | -1             | 1          | 830        | 1            | hypothetical protein DL769_002837                    |
| perA              | 0              | 1          | 829        | 0            | peramine synthetase                                  |
| MAC_04541         | 1              | 1          | 828        | 0            | branched-chain-amino-acid aminotransferase           |
| MAN_01724         | 2              | 1          | 827        | 0            | methyltransferase MppJ                               |
| XA68_14724        | 3              | 1          | 826        | 0            | Glycine amidinotransferase, mitochondrial            |
| LEL_07888         | 4              | 1          | 825        | 1            | cytochrome p450                                      |

\*Highest scoring match from BLASTp



Yow et al., **Genome Sequence of *Monilinia vaccinii-corymbosi* Sheds Light on Mummy Berry Disease Infection of Blueberry and Mating Type**

TABLE S11. Secondary metabolites identified in *Monilinia vaccinii-corymbosi* (*Mvc*) and the corresponding Maker gene model IDs.

| Secondary Metabolite | Mvc Gene IDs                                                                                                                                         |
|----------------------|------------------------------------------------------------------------------------------------------------------------------------------------------|
| PKS                  | MvcIVH1_09511; MvcIVH1_08510; MvcIVH1_02794; MvcIVH1_03991; MvcIVH1_05498; MvcIVH1_08328; MvcIVH1_07942; MvcIVH1_03988; MvcIVH1_07322; MvcIVH1_01583 |
| PKS-like             | MvcIVH1_02022; MvcIVH1_01524                                                                                                                         |
| NRPS                 | MvcIVH1_05953; MvcIVH1_08639; MvcIVH1_00410; MvcIVH1_05756; MvcIVH1_00581                                                                            |
| NRPS-like            | MvcIVH1_00086; MvcIVH1_03357; MvcIVH1_05513; MvcIVH1_01187; MvcIVH1_08279                                                                            |
| PKS-NRPS Hybrid      | MvcIVH1_00044                                                                                                                                        |

TABLE S12. Fisher's Exact Test results for GO biological process term enrichment of secondary metabolite biosynthesis clusters identified by SMURF in *Monilinia vaccinii-corymbosi* (*Mvc*). The SMURF subset was compared to the entire set of *Mvc* predicted gene models.

| Tags    | GO ID      | GO Name                                       | GO Category        | FDR         |
|---------|------------|-----------------------------------------------|--------------------|-------------|
| [UNDER] | GO:0071840 | cellular component organization or biogenesis | BIOLOGICAL_PROCESS | 0.006057944 |
| [UNDER] | GO:0016043 | cellular component organization               | BIOLOGICAL_PROCESS | 0.007482038 |
| [OVER]  | GO:0055114 | oxidation-reduction process                   | BIOLOGICAL_PROCESS | 1.00E-08    |
| [OVER]  | GO:0009405 | pathogenesis                                  | BIOLOGICAL_PROCESS | 4.47E-04    |
| [OVER]  | GO:0044419 | interspecies interaction between organisms    | BIOLOGICAL_PROCESS | 0.001973408 |

Yow et al., **Genome Sequence of *Monilinia vaccinii-corymbosi* Sheds Light on Mummy Berry Disease Infection of Blueberry and Mating Type**

TABLE S13. Fisher's Exact Test results for GO biological process term enrichment of signal peptide sequences identified by SignalP in *Monilinia vaccinii-corymbosi* (*Mvc*). The SignalP subset was compared to the entire set of *Mvc* predicted gene models.

| Tags    | GO ID      | GO Name                                             | GO Category        | FDR      |
|---------|------------|-----------------------------------------------------|--------------------|----------|
| [UNDER] | GO:0034641 | cellular nitrogen compound metabolic process        | BIOLOGICAL_PROCESS | 4.78E-52 |
| [UNDER] | GO:0046483 | heterocycle metabolic process                       | BIOLOGICAL_PROCESS | 6.74E-49 |
| [UNDER] | GO:1901360 | organic cyclic compound metabolic process           | BIOLOGICAL_PROCESS | 2.66E-48 |
| [UNDER] | GO:0006139 | nucleobase-containing compound metabolic process    | BIOLOGICAL_PROCESS | 7.36E-48 |
| [UNDER] | GO:0010467 | gene expression                                     | BIOLOGICAL_PROCESS | 1.95E-46 |
| [UNDER] | GO:0006725 | cellular aromatic compound metabolic process        | BIOLOGICAL_PROCESS | 3.85E-46 |
| [UNDER] | GO:0090304 | nucleic acid metabolic process                      | BIOLOGICAL_PROCESS | 9.01E-44 |
| [UNDER] | GO:0044271 | cellular nitrogen compound biosynthetic process     | BIOLOGICAL_PROCESS | 3.69E-39 |
| [UNDER] | GO:0016070 | RNA metabolic process                               | BIOLOGICAL_PROCESS | 8.46E-38 |
| [UNDER] | GO:0009058 | biosynthetic process                                | BIOLOGICAL_PROCESS | 2.82E-33 |
| [UNDER] | GO:0044249 | cellular biosynthetic process                       | BIOLOGICAL_PROCESS | 3.58E-32 |
| [UNDER] | GO:0050789 | regulation of biological process                    | BIOLOGICAL_PROCESS | 1.09E-31 |
| [UNDER] | GO:1901576 | organic substance biosynthetic process              | BIOLOGICAL_PROCESS | 1.89E-31 |
| [UNDER] | GO:0019222 | regulation of metabolic process                     | BIOLOGICAL_PROCESS | 2.22E-31 |
| [UNDER] | GO:0065007 | biological regulation                               | BIOLOGICAL_PROCESS | 4.48E-31 |
| [UNDER] | GO:0018130 | heterocycle biosynthetic process                    | BIOLOGICAL_PROCESS | 9.10E-31 |
| [UNDER] | GO:0009987 | cellular process                                    | BIOLOGICAL_PROCESS | 2.82E-30 |
| [UNDER] | GO:0019438 | aromatic compound biosynthetic process              | BIOLOGICAL_PROCESS | 4.85E-30 |
| [UNDER] | GO:0050794 | regulation of cellular process                      | BIOLOGICAL_PROCESS | 4.96E-30 |
| [UNDER] | GO:0060255 | regulation of macromolecule metabolic process       | BIOLOGICAL_PROCESS | 5.76E-30 |
| [UNDER] | GO:1901362 | organic cyclic compound biosynthetic process        | BIOLOGICAL_PROCESS | 7.76E-30 |
| [UNDER] | GO:0080090 | regulation of primary metabolic process             | BIOLOGICAL_PROCESS | 1.10E-29 |
| [UNDER] | GO:0031323 | regulation of cellular metabolic process            | BIOLOGICAL_PROCESS | 1.29E-29 |
| [UNDER] | GO:0034654 | nucleobase-containing compound biosynthetic process | BIOLOGICAL_PROCESS | 1.38E-29 |
| [UNDER] | GO:0051171 | regulation of nitrogen compound metabolic process   | BIOLOGICAL_PROCESS | 9.38E-29 |
| [UNDER] | GO:0031326 | regulation of cellular biosynthetic process         | BIOLOGICAL_PROCESS | 1.97E-28 |
| [UNDER] | GO:0009889 | regulation of biosynthetic process                  | BIOLOGICAL_PROCESS | 1.97E-28 |
| [UNDER] | GO:0010556 | regulation of macromolecule biosynthetic process    | BIOLOGICAL_PROCESS | 6.93E-27 |

Yow et al., **Genome Sequence of *Monilinia vaccinii-corymbosi* Sheds Light on Mummy Berry Disease Infection of Blueberry and Mating Type**

| Tags    | GO ID      | GO Name                                                        | GO Category        | FDR      |
|---------|------------|----------------------------------------------------------------|--------------------|----------|
| [UNDER] | GO:2000112 | regulation of cellular macromolecule biosynthetic process      | BIOLOGICAL_PROCESS | 1.07E-26 |
| [UNDER] | GO:0010468 | regulation of gene expression                                  | BIOLOGICAL_PROCESS | 2.36E-26 |
| [UNDER] | GO:0044237 | cellular metabolic process                                     | BIOLOGICAL_PROCESS | 2.47E-26 |
| [UNDER] | GO:0032774 | RNA biosynthetic process                                       | BIOLOGICAL_PROCESS | 1.51E-25 |
| [UNDER] | GO:0097659 | nucleic acid-templated transcription                           | BIOLOGICAL_PROCESS | 3.75E-25 |
| [UNDER] | GO:0006807 | nitrogen compound metabolic process                            | BIOLOGICAL_PROCESS | 4.62E-25 |
| [UNDER] | GO:0006351 | transcription, DNA-templated                                   | BIOLOGICAL_PROCESS | 5.86E-25 |
| [UNDER] | GO:0006996 | organelle organization                                         | BIOLOGICAL_PROCESS | 8.98E-25 |
| [UNDER] | GO:0019219 | regulation of nucleobase-containing compound metabolic process | BIOLOGICAL_PROCESS | 1.67E-24 |
| [UNDER] | GO:0009059 | macromolecule biosynthetic process                             | BIOLOGICAL_PROCESS | 3.38E-23 |
| [UNDER] | GO:0034645 | cellular macromolecule biosynthetic process                    | BIOLOGICAL_PROCESS | 4.98E-23 |
| [UNDER] | GO:0051252 | regulation of RNA metabolic process                            | BIOLOGICAL_PROCESS | 4.68E-22 |
| [UNDER] | GO:1903506 | regulation of nucleic acid-templated transcription             | BIOLOGICAL_PROCESS | 5.54E-22 |
| [UNDER] | GO:2001141 | regulation of RNA biosynthetic process                         | BIOLOGICAL_PROCESS | 5.54E-22 |
| [UNDER] | GO:0006355 | regulation of transcription, DNA-templated                     | BIOLOGICAL_PROCESS | 8.78E-22 |
| [UNDER] | GO:0051276 | chromosome organization                                        | BIOLOGICAL_PROCESS | 3.10E-20 |
| [UNDER] | GO:0022607 | cellular component assembly                                    | BIOLOGICAL_PROCESS | 2.16E-19 |
| [UNDER] | GO:0051179 | localization                                                   | BIOLOGICAL_PROCESS | 6.22E-19 |
| [UNDER] | GO:0051234 | establishment of localization                                  | BIOLOGICAL_PROCESS | 5.06E-17 |
| [UNDER] | GO:0043933 | protein-containing complex subunit organization                | BIOLOGICAL_PROCESS | 1.35E-16 |
| [UNDER] | GO:0006366 | transcription by RNA polymerase II                             | BIOLOGICAL_PROCESS | 4.30E-16 |
| [UNDER] | GO:0006810 | transport                                                      | BIOLOGICAL_PROCESS | 8.64E-16 |
| [UNDER] | GO:0044260 | cellular macromolecule metabolic process                       | BIOLOGICAL_PROCESS | 1.62E-15 |
| [UNDER] | GO:0016043 | cellular component organization                                | BIOLOGICAL_PROCESS | 3.23E-15 |
| [UNDER] | GO:0071840 | cellular component organization or biogenesis                  | BIOLOGICAL_PROCESS | 4.70E-15 |
| [UNDER] | GO:0006357 | regulation of transcription by RNA polymerase II               | BIOLOGICAL_PROCESS | 1.15E-14 |
| [UNDER] | GO:0034622 | cellular protein-containing complex assembly                   | BIOLOGICAL_PROCESS | 1.75E-14 |
| [UNDER] | GO:0048519 | negative regulation of biological process                      | BIOLOGICAL_PROCESS | 1.83E-14 |
| [UNDER] | GO:0048522 | positive regulation of cellular process                        | BIOLOGICAL_PROCESS | 4.22E-14 |
| [UNDER] | GO:0007049 | cell cycle                                                     | BIOLOGICAL_PROCESS | 9.11E-14 |

Yow et al., **Genome Sequence of *Monilinia vaccinii-corymbosi* Sheds Light on Mummy Berry Disease Infection of Blueberry and Mating Type**

| Tags    | GO ID      | GO Name                                                                 | GO Category        | FDR      |
|---------|------------|-------------------------------------------------------------------------|--------------------|----------|
| [UNDER] | GO:0034660 | ncRNA metabolic process                                                 | BIOLOGICAL_PROCESS | 1.00E-13 |
| [UNDER] | GO:0048518 | positive regulation of biological process                               | BIOLOGICAL_PROCESS | 1.29E-13 |
| [UNDER] | GO:0006396 | RNA processing                                                          | BIOLOGICAL_PROCESS | 1.84E-13 |
| [UNDER] | GO:0065003 | protein-containing complex assembly                                     | BIOLOGICAL_PROCESS | 2.62E-13 |
| [UNDER] | GO:0048523 | negative regulation of cellular process                                 | BIOLOGICAL_PROCESS | 4.82E-13 |
| [UNDER] | GO:0051128 | regulation of cellular component organization                           | BIOLOGICAL_PROCESS | 9.27E-13 |
| [UNDER] | GO:0009893 | positive regulation of metabolic process                                | BIOLOGICAL_PROCESS | 9.64E-13 |
| [UNDER] | GO:0044085 | cellular component biogenesis                                           | BIOLOGICAL_PROCESS | 1.12E-12 |
| [UNDER] | GO:0031325 | positive regulation of cellular metabolic process                       | BIOLOGICAL_PROCESS | 1.39E-12 |
| [UNDER] | GO:0022402 | cell cycle process                                                      | BIOLOGICAL_PROCESS | 3.79E-12 |
| [UNDER] | GO:0006412 | translation                                                             | BIOLOGICAL_PROCESS | 8.80E-12 |
| [UNDER] | GO:0000278 | mitotic cell cycle                                                      | BIOLOGICAL_PROCESS | 1.02E-11 |
| [UNDER] | GO:0051173 | positive regulation of nitrogen compound metabolic process              | BIOLOGICAL_PROCESS | 2.26E-11 |
| [UNDER] | GO:0033043 | regulation of organelle organization                                    | BIOLOGICAL_PROCESS | 2.51E-11 |
| [UNDER] | GO:0010604 | positive regulation of macromolecule metabolic process                  | BIOLOGICAL_PROCESS | 3.37E-11 |
| [UNDER] | GO:1903047 | mitotic cell cycle process                                              | BIOLOGICAL_PROCESS | 4.74E-11 |
| [UNDER] | GO:0006259 | DNA metabolic process                                                   | BIOLOGICAL_PROCESS | 5.99E-11 |
| [UNDER] | GO:0050896 | response to stimulus                                                    | BIOLOGICAL_PROCESS | 7.20E-11 |
| [UNDER] | GO:0051726 | regulation of cell cycle                                                | BIOLOGICAL_PROCESS | 8.31E-11 |
| [UNDER] | GO:0031327 | negative regulation of cellular biosynthetic process                    | BIOLOGICAL_PROCESS | 8.61E-11 |
| [UNDER] | GO:0009890 | negative regulation of biosynthetic process                             | BIOLOGICAL_PROCESS | 8.61E-11 |
| [UNDER] | GO:0009892 | negative regulation of metabolic process                                | BIOLOGICAL_PROCESS | 9.79E-11 |
| [UNDER] | GO:0043604 | amide biosynthetic process                                              | BIOLOGICAL_PROCESS | 1.42E-10 |
| [UNDER] | GO:0071702 | organic substance transport                                             | BIOLOGICAL_PROCESS | 2.02E-10 |
| [UNDER] | GO:0016310 | phosphorylation                                                         | BIOLOGICAL_PROCESS | 3.18E-10 |
| [UNDER] | GO:0022613 | ribonucleoprotein complex biogenesis                                    | BIOLOGICAL_PROCESS | 3.18E-10 |
| [UNDER] | GO:2000113 | negative regulation of cellular macromolecule biosynthetic process      | BIOLOGICAL_PROCESS | 4.04E-10 |
| [UNDER] | GO:0045934 | negative regulation of nucleobase-containing compound metabolic process | BIOLOGICAL_PROCESS | 4.04E-10 |
| [UNDER] | GO:0033036 | macromolecule localization                                              | BIOLOGICAL_PROCESS | 4.05E-10 |
| [UNDER] | GO:0010558 | negative regulation of macromolecule biosynthetic process               | BIOLOGICAL_PROCESS | 4.06E-10 |

Yow et al., **Genome Sequence of *Monilinia vaccinii-corymbosi* Sheds Light on Mummy Berry Disease Infection of Blueberry and Mating Type**

| Tags    | GO ID      | GO Name                                                     | GO Category        | FDR      |
|---------|------------|-------------------------------------------------------------|--------------------|----------|
| [UNDER] | GO:0006325 | chromatin organization                                      | BIOLOGICAL_PROCESS | 4.33E-10 |
| [UNDER] | GO:0034470 | ncRNA processing                                            | BIOLOGICAL_PROCESS | 4.35E-10 |
| [UNDER] | GO:0010629 | negative regulation of gene expression                      | BIOLOGICAL_PROCESS | 4.90E-10 |
| [UNDER] | GO:0010605 | negative regulation of macromolecule metabolic process      | BIOLOGICAL_PROCESS | 8.86E-10 |
| [UNDER] | GO:0031324 | negative regulation of cellular metabolic process           | BIOLOGICAL_PROCESS | 9.37E-10 |
| [UNDER] | GO:0044267 | cellular protein metabolic process                          | BIOLOGICAL_PROCESS | 9.37E-10 |
| [UNDER] | GO:0031328 | positive regulation of cellular biosynthetic process        | BIOLOGICAL_PROCESS | 1.33E-09 |
| [UNDER] | GO:0071705 | nitrogen compound transport                                 | BIOLOGICAL_PROCESS | 1.33E-09 |
| [UNDER] | GO:0009891 | positive regulation of biosynthetic process                 | BIOLOGICAL_PROCESS | 1.33E-09 |
| [UNDER] | GO:0006974 | cellular response to DNA damage stimulus                    | BIOLOGICAL_PROCESS | 1.38E-09 |
| [UNDER] | GO:0008104 | protein localization                                        | BIOLOGICAL_PROCESS | 1.67E-09 |
| [UNDER] | GO:0051641 | cellular localization                                       | BIOLOGICAL_PROCESS | 1.74E-09 |
| [UNDER] | GO:1901566 | organonitrogen compound biosynthetic process                | BIOLOGICAL_PROCESS | 4.28E-09 |
| [UNDER] | GO:0051172 | negative regulation of nitrogen compound metabolic process  | BIOLOGICAL_PROCESS | 4.33E-09 |
| [UNDER] | GO:0042254 | ribosome biogenesis                                         | BIOLOGICAL_PROCESS | 4.38E-09 |
| [UNDER] | GO:0043412 | macromolecule modification                                  | BIOLOGICAL_PROCESS | 5.72E-09 |
| [UNDER] | GO:0010557 | positive regulation of macromolecule biosynthetic process   | BIOLOGICAL_PROCESS | 9.68E-09 |
| [UNDER] | GO:0051253 | negative regulation of RNA metabolic process                | BIOLOGICAL_PROCESS | 9.90E-09 |
| [UNDER] | GO:0010564 | regulation of cell cycle process                            | BIOLOGICAL_PROCESS | 9.90E-09 |
| [UNDER] | GO:0070727 | cellular macromolecule localization                         | BIOLOGICAL_PROCESS | 1.23E-08 |
| [UNDER] | GO:0006518 | peptide metabolic process                                   | BIOLOGICAL_PROCESS | 1.70E-08 |
| [UNDER] | GO:0045892 | negative regulation of transcription, DNA-templated         | BIOLOGICAL_PROCESS | 2.12E-08 |
| [UNDER] | GO:0010628 | positive regulation of gene expression                      | BIOLOGICAL_PROCESS | 2.14E-08 |
| [UNDER] | GO:1903507 | negative regulation of nucleic acid-templated transcription | BIOLOGICAL_PROCESS | 2.20E-08 |
| [UNDER] | GO:1902679 | negative regulation of RNA biosynthetic process             | BIOLOGICAL_PROCESS | 2.20E-08 |
| [UNDER] | GO:0043043 | peptide biosynthetic process                                | BIOLOGICAL_PROCESS | 2.37E-08 |
| [UNDER] | GO:0051716 | cellular response to stimulus                               | BIOLOGICAL_PROCESS | 2.55E-08 |
| [UNDER] | GO:0042886 | amide transport                                             | BIOLOGICAL_PROCESS | 2.56E-08 |
| [UNDER] | GO:0034613 | cellular protein localization                               | BIOLOGICAL_PROCESS | 3.24E-08 |
| [UNDER] | GO:0006281 | DNA repair                                                  | BIOLOGICAL_PROCESS | 4.47E-08 |

Yow et al., **Genome Sequence of *Monilinia vaccinii-corymbosi* Sheds Light on Mummy Berry Disease Infection of Blueberry and Mating Type**

| Tags    | GO ID      | GO Name                                                                 | GO Category        | FDR      |
|---------|------------|-------------------------------------------------------------------------|--------------------|----------|
| [UNDER] | GO:0015833 | peptide transport                                                       | BIOLOGICAL_PROCESS | 4.97E-08 |
| [UNDER] | GO:0044281 | small molecule metabolic process                                        | BIOLOGICAL_PROCESS | 5.27E-08 |
| [UNDER] | GO:0006796 | phosphate-containing compound metabolic process                         | BIOLOGICAL_PROCESS | 7.01E-08 |
| [UNDER] | GO:0045184 | establishment of protein localization                                   | BIOLOGICAL_PROCESS | 7.25E-08 |
| [UNDER] | GO:0045935 | positive regulation of nucleobase-containing compound metabolic process | BIOLOGICAL_PROCESS | 1.43E-07 |
| [UNDER] | GO:0046907 | intracellular transport                                                 | BIOLOGICAL_PROCESS | 1.46E-07 |
| [UNDER] | GO:0015031 | protein transport                                                       | BIOLOGICAL_PROCESS | 1.94E-07 |
| [UNDER] | GO:0051246 | regulation of protein metabolic process                                 | BIOLOGICAL_PROCESS | 1.96E-07 |
| [UNDER] | GO:0007059 | chromosome segregation                                                  | BIOLOGICAL_PROCESS | 2.21E-07 |
| [UNDER] | GO:0007346 | regulation of mitotic cell cycle                                        | BIOLOGICAL_PROCESS | 2.21E-07 |
| [UNDER] | GO:0055085 | transmembrane transport                                                 | BIOLOGICAL_PROCESS | 2.22E-07 |
| [UNDER] | GO:0043603 | cellular amide metabolic process                                        | BIOLOGICAL_PROCESS | 2.38E-07 |
| [UNDER] | GO:0048285 | organelle fission                                                       | BIOLOGICAL_PROCESS | 3.03E-07 |
| [UNDER] | GO:0006793 | phosphorus metabolic process                                            | BIOLOGICAL_PROCESS | 3.07E-07 |
| [UNDER] | GO:0032268 | regulation of cellular protein metabolic process                        | BIOLOGICAL_PROCESS | 4.05E-07 |
| [UNDER] | GO:0016072 | rRNA metabolic process                                                  | BIOLOGICAL_PROCESS | 4.41E-07 |
| [UNDER] | GO:1903508 | positive regulation of nucleic acid-templated transcription             | BIOLOGICAL_PROCESS | 4.53E-07 |
| [UNDER] | GO:1902680 | positive regulation of RNA biosynthetic process                         | BIOLOGICAL_PROCESS | 4.66E-07 |
| [UNDER] | GO:0044770 | cell cycle phase transition                                             | BIOLOGICAL_PROCESS | 4.76E-07 |
| [UNDER] | GO:0000280 | nuclear division                                                        | BIOLOGICAL_PROCESS | 6.41E-07 |
| [UNDER] | GO:0045893 | positive regulation of transcription, DNA-templated                     | BIOLOGICAL_PROCESS | 6.41E-07 |
| [UNDER] | GO:0044772 | mitotic cell cycle phase transition                                     | BIOLOGICAL_PROCESS | 7.25E-07 |
| [UNDER] | GO:0098813 | nuclear chromosome segregation                                          | BIOLOGICAL_PROCESS | 7.52E-07 |
| [UNDER] | GO:0006464 | cellular protein modification process                                   | BIOLOGICAL_PROCESS | 9.86E-07 |
| [UNDER] | GO:0036211 | protein modification process                                            | BIOLOGICAL_PROCESS | 9.86E-07 |
| [UNDER] | GO:0140014 | mitotic nuclear division                                                | BIOLOGICAL_PROCESS | 1.04E-06 |
| [UNDER] | GO:0051254 | positive regulation of RNA metabolic process                            | BIOLOGICAL_PROCESS | 1.31E-06 |
| [UNDER] | GO:0051649 | establishment of localization in cell                                   | BIOLOGICAL_PROCESS | 2.52E-06 |
| [UNDER] | GO:0000819 | sister chromatid segregation                                            | BIOLOGICAL_PROCESS | 3.42E-06 |
| [UNDER] | GO:0006886 | intracellular protein transport                                         | BIOLOGICAL_PROCESS | 3.63E-06 |



Yow et al., **Genome Sequence of *Monilinia vaccinii-corymbosi* Sheds Light on Mummy Berry Disease Infection of Blueberry and Mating Type**

| Tags    | GO ID      | GO Name                                                                 | GO Category        | FDR      |
|---------|------------|-------------------------------------------------------------------------|--------------------|----------|
| [UNDER] | GO:0006364 | rRNA processing                                                         | BIOLOGICAL_PROCESS | 4.45E-06 |
| [UNDER] | GO:0043170 | macromolecule metabolic process                                         | BIOLOGICAL_PROCESS | 4.55E-06 |
| [UNDER] | GO:0033044 | regulation of chromosome organization                                   | BIOLOGICAL_PROCESS | 5.20E-06 |
| [UNDER] | GO:0065009 | regulation of molecular function                                        | BIOLOGICAL_PROCESS | 5.38E-06 |
| [UNDER] | GO:0016071 | mRNA metabolic process                                                  | BIOLOGICAL_PROCESS | 6.92E-06 |
| [UNDER] | GO:0019752 | carboxylic acid metabolic process                                       | BIOLOGICAL_PROCESS | 7.37E-06 |
| [UNDER] | GO:0006082 | organic acid metabolic process                                          | BIOLOGICAL_PROCESS | 8.50E-06 |
| [UNDER] | GO:0045944 | positive regulation of transcription by RNA polymerase II               | BIOLOGICAL_PROCESS | 9.27E-06 |
| [UNDER] | GO:0070647 | protein modification by small protein conjugation or removal            | BIOLOGICAL_PROCESS | 9.35E-06 |
| [UNDER] | GO:0043436 | oxoacid metabolic process                                               | BIOLOGICAL_PROCESS | 1.16E-05 |
| [UNDER] | GO:0006468 | protein phosphorylation                                                 | BIOLOGICAL_PROCESS | 1.23E-05 |
| [UNDER] | GO:0071824 | protein-DNA complex subunit organization                                | BIOLOGICAL_PROCESS | 1.64E-05 |
| [UNDER] | GO:1901987 | regulation of cell cycle phase transition                               | BIOLOGICAL_PROCESS | 1.68E-05 |
| [UNDER] | GO:0000070 | mitotic sister chromatid segregation                                    | BIOLOGICAL_PROCESS | 1.74E-05 |
| [UNDER] | GO:1901990 | regulation of mitotic cell cycle phase transition                       | BIOLOGICAL_PROCESS | 2.57E-05 |
| [UNDER] | GO:0051130 | positive regulation of cellular component organization                  | BIOLOGICAL_PROCESS | 2.93E-05 |
| [UNDER] | GO:0051640 | organelle localization                                                  | BIOLOGICAL_PROCESS | 6.48E-05 |
| [UNDER] | GO:0044283 | small molecule biosynthetic process                                     | BIOLOGICAL_PROCESS | 6.55E-05 |
| [UNDER] | GO:0002181 | cytoplasmic translation                                                 | BIOLOGICAL_PROCESS | 6.65E-05 |
| [UNDER] | GO:0045786 | negative regulation of cell cycle                                       | BIOLOGICAL_PROCESS | 7.96E-05 |
| [UNDER] | GO:0006260 | DNA replication                                                         | BIOLOGICAL_PROCESS | 8.10E-05 |
| [UNDER] | GO:0016458 | gene silencing                                                          | BIOLOGICAL_PROCESS | 8.32E-05 |
| [UNDER] | GO:0006399 | tRNA metabolic process                                                  | BIOLOGICAL_PROCESS | 9.07E-05 |
| [UNDER] | GO:0010638 | positive regulation of organelle organization                           | BIOLOGICAL_PROCESS | 1.17E-04 |
| [UNDER] | GO:0040029 | regulation of gene expression, epigenetic                               | BIOLOGICAL_PROCESS | 1.18E-04 |
| [UNDER] | GO:0007010 | cytoskeleton organization                                               | BIOLOGICAL_PROCESS | 1.18E-04 |
| [UNDER] | GO:0051783 | regulation of nuclear division                                          | BIOLOGICAL_PROCESS | 1.18E-04 |
| [UNDER] | GO:0006261 | DNA-dependent DNA replication                                           | BIOLOGICAL_PROCESS | 1.72E-04 |
| [UNDER] | GO:0097549 | chromatin organization involved in negative regulation of transcription | BIOLOGICAL_PROCESS | 1.73E-04 |
| [UNDER] | GO:0045814 | negative regulation of gene expression, epigenetic                      | BIOLOGICAL_PROCESS | 1.73E-04 |

Yow et al., **Genome Sequence of *Monilinia vaccinii-corymbosi* Sheds Light on Mummy Berry Disease Infection of Blueberry and Mating Type**

| Tags    | GO ID      | GO Name                                                        | GO Category        | FDR      |
|---------|------------|----------------------------------------------------------------|--------------------|----------|
| [UNDER] | GO:0006342 | chromatin silencing                                            | BIOLOGICAL_PROCESS | 1.73E-04 |
| [UNDER] | GO:0071103 | DNA conformation change                                        | BIOLOGICAL_PROCESS | 1.82E-04 |
| [UNDER] | GO:0006913 | nucleocytoplasmic transport                                    | BIOLOGICAL_PROCESS | 1.82E-04 |
| [UNDER] | GO:0051169 | nuclear transport                                              | BIOLOGICAL_PROCESS | 1.82E-04 |
| [UNDER] | GO:0034401 | chromatin organization involved in regulation of transcription | BIOLOGICAL_PROCESS | 1.82E-04 |
| [UNDER] | GO:0032270 | positive regulation of cellular protein metabolic process      | BIOLOGICAL_PROCESS | 1.96E-04 |
| [UNDER] | GO:0031399 | regulation of protein modification process                     | BIOLOGICAL_PROCESS | 2.02E-04 |
| [UNDER] | GO:0051247 | positive regulation of protein metabolic process               | BIOLOGICAL_PROCESS | 2.02E-04 |
| [UNDER] | GO:0006811 | ion transport                                                  | BIOLOGICAL_PROCESS | 2.42E-04 |
| [UNDER] | GO:0065008 | regulation of biological quality                               | BIOLOGICAL_PROCESS | 2.44E-04 |
| [UNDER] | GO:0016569 | covalent chromatin modification                                | BIOLOGICAL_PROCESS | 2.53E-04 |
| [UNDER] | GO:0016570 | histone modification                                           | BIOLOGICAL_PROCESS | 2.53E-04 |
| [UNDER] | GO:1901564 | organonitrogen compound metabolic process                      | BIOLOGICAL_PROCESS | 2.60E-04 |
| [UNDER] | GO:0051174 | regulation of phosphorus metabolic process                     | BIOLOGICAL_PROCESS | 2.67E-04 |
| [UNDER] | GO:0019220 | regulation of phosphate metabolic process                      | BIOLOGICAL_PROCESS | 2.67E-04 |
| [UNDER] | GO:0044087 | regulation of cellular component biogenesis                    | BIOLOGICAL_PROCESS | 2.71E-04 |
| [UNDER] | GO:0070925 | organelle assembly                                             | BIOLOGICAL_PROCESS | 2.76E-04 |
| [UNDER] | GO:0051656 | establishment of organelle localization                        | BIOLOGICAL_PROCESS | 3.63E-04 |
| [UNDER] | GO:0023052 | signaling                                                      | BIOLOGICAL_PROCESS | 3.68E-04 |
| [UNDER] | GO:0045787 | positive regulation of cell cycle                              | BIOLOGICAL_PROCESS | 3.97E-04 |
| [UNDER] | GO:0051188 | cofactor biosynthetic process                                  | BIOLOGICAL_PROCESS | 4.01E-04 |
| [UNDER] | GO:0035556 | intracellular signal transduction                              | BIOLOGICAL_PROCESS | 4.47E-04 |
| [UNDER] | GO:0007005 | mitochondrion organization                                     | BIOLOGICAL_PROCESS | 4.58E-04 |
| [UNDER] | GO:0051186 | cofactor metabolic process                                     | BIOLOGICAL_PROCESS | 7.44E-04 |
| [UNDER] | GO:0090068 | positive regulation of cell cycle process                      | BIOLOGICAL_PROCESS | 7.94E-04 |
| [UNDER] | GO:0051129 | negative regulation of cellular component organization         | BIOLOGICAL_PROCESS | 7.94E-04 |
| [UNDER] | GO:0006338 | chromatin remodeling                                           | BIOLOGICAL_PROCESS | 8.00E-04 |
| [UNDER] | GO:0008380 | RNA splicing                                                   | BIOLOGICAL_PROCESS | 8.63E-04 |
| [UNDER] | GO:0016192 | vesicle-mediated transport                                     | BIOLOGICAL_PROCESS | 8.69E-04 |
| [UNDER] | GO:0016053 | organic acid biosynthetic process                              | BIOLOGICAL_PROCESS | 9.27E-04 |



Yow et al., **Genome Sequence of *Monilinia vaccinii-corymbosi* Sheds Light on Mummy Berry Disease Infection of Blueberry and Mating Type**

| Tags    | GO ID      | GO Name                                                                              | GO Category        | FDR         |
|---------|------------|--------------------------------------------------------------------------------------|--------------------|-------------|
| [UNDER] | GO:0006397 | mRNA processing                                                                      | BIOLOGICAL_PROCESS | 9.27E-04    |
| [UNDER] | GO:0050790 | regulation of catalytic activity                                                     | BIOLOGICAL_PROCESS | 9.70E-04    |
| [UNDER] | GO:0055086 | nucleobase-containing small molecule metabolic process                               | BIOLOGICAL_PROCESS | 0.001031009 |
| [UNDER] | GO:0090407 | organophosphate biosynthetic process                                                 | BIOLOGICAL_PROCESS | 0.001055755 |
| [UNDER] | GO:0006950 | response to stress                                                                   | BIOLOGICAL_PROCESS | 0.001139747 |
| [UNDER] | GO:0010608 | posttranscriptional regulation of gene expression                                    | BIOLOGICAL_PROCESS | 0.001162732 |
| [UNDER] | GO:0006403 | RNA localization                                                                     | BIOLOGICAL_PROCESS | 0.001164836 |
| [UNDER] | GO:0007088 | regulation of mitotic nuclear division                                               | BIOLOGICAL_PROCESS | 0.001164836 |
| [UNDER] | GO:0032446 | protein modification by small protein conjugation                                    | BIOLOGICAL_PROCESS | 0.001176254 |
| [UNDER] | GO:0000122 | negative regulation of transcription by RNA polymerase II                            | BIOLOGICAL_PROCESS | 0.001181645 |
| [UNDER] | GO:0006310 | DNA recombination                                                                    | BIOLOGICAL_PROCESS | 0.001193091 |
| [UNDER] | GO:0031503 | protein-containing complex localization                                              | BIOLOGICAL_PROCESS | 0.001210611 |
| [UNDER] | GO:0010948 | negative regulation of cell cycle process                                            | BIOLOGICAL_PROCESS | 0.001210611 |
| [UNDER] | GO:0006753 | nucleoside phosphate metabolic process                                               | BIOLOGICAL_PROCESS | 0.001277992 |
| [UNDER] | GO:0071826 | ribonucleoprotein complex subunit organization                                       | BIOLOGICAL_PROCESS | 0.001308012 |
| [UNDER] | GO:0046394 | carboxylic acid biosynthetic process                                                 | BIOLOGICAL_PROCESS | 0.001311187 |
| [UNDER] | GO:0044093 | positive regulation of molecular function                                            | BIOLOGICAL_PROCESS | 0.001311187 |
| [UNDER] | GO:0010639 | negative regulation of organelle organization                                        | BIOLOGICAL_PROCESS | 0.001656722 |
| [UNDER] | GO:0007017 | microtubule-based process                                                            | BIOLOGICAL_PROCESS | 0.001674978 |
| [UNDER] | GO:0045930 | negative regulation of mitotic cell cycle                                            | BIOLOGICAL_PROCESS | 0.001674978 |
| [UNDER] | GO:0006302 | double-strand break repair                                                           | BIOLOGICAL_PROCESS | 0.001718766 |
| [UNDER] | GO:0009117 | nucleotide metabolic process                                                         | BIOLOGICAL_PROCESS | 0.001743762 |
| [UNDER] | GO:0065004 | protein-DNA complex assembly                                                         | BIOLOGICAL_PROCESS | 0.001751114 |
| [UNDER] | GO:0006732 | coenzyme metabolic process                                                           | BIOLOGICAL_PROCESS | 0.001882239 |
| [UNDER] | GO:0033554 | cellular response to stress                                                          | BIOLOGICAL_PROCESS | 0.002058571 |
| [UNDER] | GO:0051321 | meiotic cell cycle                                                                   | BIOLOGICAL_PROCESS | 0.002082944 |
| [UNDER] | GO:0061024 | membrane organization                                                                | BIOLOGICAL_PROCESS | 0.002161774 |
| [UNDER] | GO:0000398 | mRNA splicing, via spliceosome                                                       | BIOLOGICAL_PROCESS | 0.002326647 |
| [UNDER] | GO:0000377 | RNA splicing, via transesterification reactions with bulged adenosine as nucleophile | BIOLOGICAL_PROCESS | 0.002326647 |

Yow et al., **Genome Sequence of *Monilinia vaccinii-corymbosi* Sheds Light on Mummy Berry Disease Infection of Blueberry and Mating Type**

| Tags    | GO ID      | GO Name                                            | GO Category        | FDR         |
|---------|------------|----------------------------------------------------|--------------------|-------------|
| [UNDER] | GO:0051983 | regulation of chromosome segregation               | BIOLOGICAL_PROCESS | 0.002349103 |
| [UNDER] | GO:0034248 | regulation of cellular amide metabolic process     | BIOLOGICAL_PROCESS | 0.002349103 |
| [UNDER] | GO:0000375 | RNA splicing, via transesterification reactions    | BIOLOGICAL_PROCESS | 0.002367155 |
| [UNDER] | GO:0007165 | signal transduction                                | BIOLOGICAL_PROCESS | 0.002448922 |
| [UNDER] | GO:0051052 | regulation of DNA metabolic process                | BIOLOGICAL_PROCESS | 0.002493835 |
| [UNDER] | GO:0022618 | ribonucleoprotein complex assembly                 | BIOLOGICAL_PROCESS | 0.002613075 |
| [UNDER] | GO:0007154 | cell communication                                 | BIOLOGICAL_PROCESS | 0.002890453 |
| [UNDER] | GO:0051301 | cell division                                      | BIOLOGICAL_PROCESS | 0.002955666 |
| [UNDER] | GO:2000241 | regulation of reproductive process                 | BIOLOGICAL_PROCESS | 0.003317581 |
| [UNDER] | GO:0033365 | protein localization to organelle                  | BIOLOGICAL_PROCESS | 0.003440662 |
| [UNDER] | GO:0045931 | positive regulation of mitotic cell cycle          | BIOLOGICAL_PROCESS | 0.003442932 |
| [UNDER] | GO:0006839 | mitochondrial transport                            | BIOLOGICAL_PROCESS | 0.003465396 |
| [UNDER] | GO:0140053 | mitochondrial gene expression                      | BIOLOGICAL_PROCESS | 0.003633543 |
| [UNDER] | GO:0072594 | establishment of protein localization to organelle | BIOLOGICAL_PROCESS | 0.003805352 |
| [UNDER] | GO:0032502 | developmental process                              | BIOLOGICAL_PROCESS | 0.004352971 |
| [UNDER] | GO:0016567 | protein ubiquitination                             | BIOLOGICAL_PROCESS | 0.004718217 |
| [UNDER] | GO:0048583 | regulation of response to stimulus                 | BIOLOGICAL_PROCESS | 0.0047811   |
| [UNDER] | GO:0006611 | protein export from nucleus                        | BIOLOGICAL_PROCESS | 0.005017265 |
| [UNDER] | GO:0006520 | cellular amino acid metabolic process              | BIOLOGICAL_PROCESS | 0.005074896 |
| [UNDER] | GO:0017038 | protein import                                     | BIOLOGICAL_PROCESS | 0.005113277 |
| [UNDER] | GO:0050658 | RNA transport                                      | BIOLOGICAL_PROCESS | 0.005113277 |
| [UNDER] | GO:0033045 | regulation of sister chromatid segregation         | BIOLOGICAL_PROCESS | 0.005113277 |
| [UNDER] | GO:0051236 | establishment of RNA localization                  | BIOLOGICAL_PROCESS | 0.005113277 |
| [UNDER] | GO:0050657 | nucleic acid transport                             | BIOLOGICAL_PROCESS | 0.005305836 |
| [UNDER] | GO:0051168 | nuclear export                                     | BIOLOGICAL_PROCESS | 0.005305836 |
| [UNDER] | GO:0022414 | reproductive process                               | BIOLOGICAL_PROCESS | 0.005357661 |
| [UNDER] | GO:0034220 | ion transmembrane transport                        | BIOLOGICAL_PROCESS | 0.005512929 |
| [UNDER] | GO:0000003 | reproduction                                       | BIOLOGICAL_PROCESS | 0.006326998 |
| [UNDER] | GO:0032879 | regulation of localization                         | BIOLOGICAL_PROCESS | 0.006350132 |
| [UNDER] | GO:0043085 | positive regulation of catalytic activity          | BIOLOGICAL_PROCESS | 0.00652363  |

Yow et al., **Genome Sequence of *Monilinia vaccinii-corymbosi* Sheds Light on Mummy Berry Disease Infection of Blueberry and Mating Type**

| Tags    | GO ID      | GO Name                                                | GO Category        | FDR         |
|---------|------------|--------------------------------------------------------|--------------------|-------------|
| [UNDER] | GO:1901293 | nucleoside phosphate biosynthetic process              | BIOLOGICAL_PROCESS | 0.006587748 |
| [UNDER] | GO:0051304 | chromosome separation                                  | BIOLOGICAL_PROCESS | 0.007186818 |
| [UNDER] | GO:0006417 | regulation of translation                              | BIOLOGICAL_PROCESS | 0.007243282 |
| [UNDER] | GO:0000226 | microtubule cytoskeleton organization                  | BIOLOGICAL_PROCESS | 0.007418803 |
| [UNDER] | GO:0033047 | regulation of mitotic sister chromatid segregation     | BIOLOGICAL_PROCESS | 0.007687769 |
| [UNDER] | GO:0008152 | metabolic process                                      | BIOLOGICAL_PROCESS | 0.008459925 |
| [UNDER] | GO:0006820 | anion transport                                        | BIOLOGICAL_PROCESS | 0.008928988 |
| [UNDER] | GO:0009108 | coenzyme biosynthetic process                          | BIOLOGICAL_PROCESS | 0.009518281 |
| [UNDER] | GO:0009165 | nucleotide biosynthetic process                        | BIOLOGICAL_PROCESS | 0.009841265 |
| [OVER]  | GO:0005975 | carbohydrate metabolic process                         | BIOLOGICAL_PROCESS | 2.02E-47    |
| [OVER]  | GO:0005976 | polysaccharide metabolic process                       | BIOLOGICAL_PROCESS | 1.12E-29    |
| [OVER]  | GO:0000272 | polysaccharide catabolic process                       | BIOLOGICAL_PROCESS | 4.50E-29    |
| [OVER]  | GO:0016052 | carbohydrate catabolic process                         | BIOLOGICAL_PROCESS | 1.43E-24    |
| [OVER]  | GO:0071554 | cell wall organization or biogenesis                   | BIOLOGICAL_PROCESS | 1.07E-17    |
| [OVER]  | GO:0044264 | cellular polysaccharide metabolic process              | BIOLOGICAL_PROCESS | 5.21E-14    |
| [OVER]  | GO:0044036 | cell wall macromolecule metabolic process              | BIOLOGICAL_PROCESS | 6.02E-12    |
| [OVER]  | GO:0010383 | cell wall polysaccharide metabolic process             | BIOLOGICAL_PROCESS | 7.53E-12    |
| [OVER]  | GO:0051273 | beta-glucan metabolic process                          | BIOLOGICAL_PROCESS | 5.34E-10    |
| [OVER]  | GO:0044042 | glucan metabolic process                               | BIOLOGICAL_PROCESS | 1.27E-09    |
| [OVER]  | GO:0010393 | galacturonan metabolic process                         | BIOLOGICAL_PROCESS | 6.76E-09    |
| [OVER]  | GO:0045488 | pectin metabolic process                               | BIOLOGICAL_PROCESS | 6.76E-09    |
| [OVER]  | GO:0045490 | pectin catabolic process                               | BIOLOGICAL_PROCESS | 6.76E-09    |
| [OVER]  | GO:0006073 | cellular glucan metabolic process                      | BIOLOGICAL_PROCESS | 1.66E-08    |
| [OVER]  | GO:0071852 | fungus-type cell wall organization or biogenesis       | BIOLOGICAL_PROCESS | 2.03E-08    |
| [OVER]  | GO:0071555 | cell wall organization                                 | BIOLOGICAL_PROCESS | 2.33E-08    |
| [OVER]  | GO:0045229 | external encapsulating structure organization          | BIOLOGICAL_PROCESS | 3.57E-08    |
| [OVER]  | GO:0071966 | fungus-type cell wall polysaccharide metabolic process | BIOLOGICAL_PROCESS | 6.02E-08    |
| [OVER]  | GO:0044262 | cellular carbohydrate metabolic process                | BIOLOGICAL_PROCESS | 1.17E-07    |
| [OVER]  | GO:0034975 | protein folding in endoplasmic reticulum               | BIOLOGICAL_PROCESS | 1.79E-07    |
| [OVER]  | GO:0044247 | cellular polysaccharide catabolic process              | BIOLOGICAL_PROCESS | 3.46E-07    |

Yow et al., **Genome Sequence of *Monilinia vaccinii-corymbosi* Sheds Light on Mummy Berry Disease Infection of Blueberry and Mating Type**

| Tags   | GO ID      | GO Name                                                         | GO Category        | FDR         |
|--------|------------|-----------------------------------------------------------------|--------------------|-------------|
| [OVER] | GO:0070879 | fungus-type cell wall beta-glucan metabolic process             | BIOLOGICAL_PROCESS | 3.85E-07    |
| [OVER] | GO:0009251 | glucan catabolic process                                        | BIOLOGICAL_PROCESS | 1.97E-06    |
| [OVER] | GO:0044347 | cell wall polysaccharide catabolic process                      | BIOLOGICAL_PROCESS | 3.13E-06    |
| [OVER] | GO:0044275 | cellular carbohydrate catabolic process                         | BIOLOGICAL_PROCESS | 6.74E-06    |
| [OVER] | GO:0034406 | cell wall beta-glucan metabolic process                         | BIOLOGICAL_PROCESS | 6.83E-06    |
| [OVER] | GO:0016998 | cell wall macromolecule catabolic process                       | BIOLOGICAL_PROCESS | 9.87E-06    |
| [OVER] | GO:0006508 | proteolysis                                                     | BIOLOGICAL_PROCESS | 1.65E-05    |
| [OVER] | GO:0042546 | cell wall biogenesis                                            | BIOLOGICAL_PROCESS | 2.27E-05    |
| [OVER] | GO:1901575 | organic substance catabolic process                             | BIOLOGICAL_PROCESS | 5.01E-05    |
| [OVER] | GO:0070880 | fungus-type cell wall beta-glucan biosynthetic process          | BIOLOGICAL_PROCESS | 6.22E-05    |
| [OVER] | GO:0010410 | hemicellulose metabolic process                                 | BIOLOGICAL_PROCESS | 6.76E-05    |
| [OVER] | GO:0009272 | fungus-type cell wall biogenesis                                | BIOLOGICAL_PROCESS | 7.60E-05    |
| [OVER] | GO:0042737 | drug catabolic process                                          | BIOLOGICAL_PROCESS | 1.68E-04    |
| [OVER] | GO:0031505 | fungus-type cell wall organization                              | BIOLOGICAL_PROCESS | 1.68E-04    |
| [OVER] | GO:0009057 | macromolecule catabolic process                                 | BIOLOGICAL_PROCESS | 1.72E-04    |
| [OVER] | GO:0009395 | phospholipid catabolic process                                  | BIOLOGICAL_PROCESS | 4.01E-04    |
| [OVER] | GO:0051275 | beta-glucan catabolic process                                   | BIOLOGICAL_PROCESS | 4.01E-04    |
| [OVER] | GO:0051274 | beta-glucan biosynthetic process                                | BIOLOGICAL_PROCESS | 4.10E-04    |
| [OVER] | GO:0034410 | cell wall beta-glucan biosynthetic process                      | BIOLOGICAL_PROCESS | 7.28E-04    |
| [OVER] | GO:0030243 | cellulose metabolic process                                     | BIOLOGICAL_PROCESS | 0.001290578 |
| [OVER] | GO:0030245 | cellulose catabolic process                                     | BIOLOGICAL_PROCESS | 0.001290578 |
| [OVER] | GO:0071970 | fungus-type cell wall (1->3)-beta-D-glucan biosynthetic process | BIOLOGICAL_PROCESS | 0.001742689 |
| [OVER] | GO:0071969 | fungus-type cell wall (1->3)-beta-D-glucan metabolic process    | BIOLOGICAL_PROCESS | 0.001742689 |
| [OVER] | GO:0051278 | fungus-type cell wall polysaccharide biosynthetic process       | BIOLOGICAL_PROCESS | 0.003718481 |
| [OVER] | GO:0009100 | glycoprotein metabolic process                                  | BIOLOGICAL_PROCESS | 0.004496616 |
| [OVER] | GO:0009056 | catabolic process                                               | BIOLOGICAL_PROCESS | 0.004520098 |
| [OVER] | GO:0045493 | xylan catabolic process                                         | BIOLOGICAL_PROCESS | 0.004867517 |
| [OVER] | GO:0045491 | xylan metabolic process                                         | BIOLOGICAL_PROCESS | 0.004867517 |
| [OVER] | GO:0046938 | phytochelatins biosynthetic process                             | BIOLOGICAL_PROCESS | 0.004867517 |
| [OVER] | GO:0046937 | phytochelatins metabolic process                                | BIOLOGICAL_PROCESS | 0.004867517 |

Yow et al., **Genome Sequence of *Monilinia vaccinii-corymbosi* Sheds Light on Mummy Berry Disease Infection of Blueberry and Mating Type**

| Tags   | GO ID      | GO Name                     | GO Category        | FDR        |
|--------|------------|-----------------------------|--------------------|------------|
| [OVER] | GO:0009250 | glucan biosynthetic process | BIOLOGICAL_PROCESS | 0.00801222 |

Yow et al., **Genome Sequence of *Monilinia vaccinii-corymbosi* Sheds Light on Mummy Berry Disease Infection of Blueberry and Mating Type**

TABLE S14. Mating type locus (*MAT*) genes for *Monilinia vaccinii-corymbosi* and closely related fungi *Botrytis cinerea*, *Monilinia fructicola*, *Monilinia fructigena*, *Monilinia laxa*, and *Sclerotinia sclerotiorum*.

| Gene      | Species                      | Strain | Gene Length (bp) | Number of Introns | CDS Length (bp) | Protein Length (aa) |
|-----------|------------------------------|--------|------------------|-------------------|-----------------|---------------------|
| MAT1-1-1  | <i>S. trifoliorum</i>        | G27    | 1,212            | 2                 | 1,110           | 370                 |
|           | <i>S. minor</i>              | SM1    | 1,106            | 2                 | 1,005           | 335                 |
|           | <i>S. sclerotiorum</i>       | 1980   | 826              | 1                 | 777             | 259                 |
|           | <i>S. sclerotiorum</i>       | 44Ba1  | 1,106            | 2                 | 1,005           | 335                 |
|           | <i>S. sclerotiorum</i>       | 44Ba12 | 354              | 0                 | 354             | 117                 |
|           | <i>B. cinerea</i>            | B05.10 | 1,161            | 2                 | 1,062           | 354                 |
|           | <i>M. laxa</i>               | -      | 1,132            | 1                 | 1,083           | 360                 |
|           | <i>M. fructigena</i>         | -      | 1,132            | 1                 | 1,083           | 360                 |
|           | <i>M. fructicola</i>         | -      | 1,137            | 1                 | 1,083           | 360                 |
|           | <i>M. vaccinii-corymbosi</i> | RL1    | 727              | 1                 | 678             | 225*                |
| MAT1-1-5  | <i>S. trifoliorum</i>        | G27    | 1,306            | 3                 | 1,131           | 377                 |
|           | <i>S. minor</i>              | SM1    | 1,303            | 3                 | 1,131           | 377                 |
|           | <i>S. sclerotiorum</i>       | 1980   | 1,303            | 3                 | 1,131           | 377                 |
|           | <i>S. sclerotiorum</i>       | 44Ba1  | 1,303            | 3                 | 1,131           | 377                 |
|           | <i>S. sclerotiorum</i>       | 44Ba12 | 1,303            | 3                 | 1,131           | 377                 |
|           | <i>B. cinerea</i>            | B05.10 | 1,301            | 3                 | 1,131           | 377                 |
|           | <i>M. laxa</i>               | -      | 1,304            | 3                 | 1,131           | 376                 |
|           | <i>M. fructigena</i>         | -      | 1,304            | 3                 | 1,131           | 376                 |
|           | <i>M. fructicola</i>         | -      | 1,304            | 3                 | 1,131           | 376                 |
|           | <i>M. vaccinii-corymbosi</i> | RL1    | 1,038            | 2                 | 913             | 289                 |
| MAT1-2-1  | <i>S. trifoliorum</i>        | G22    | 1,210            | 2                 | 1,098           | 366                 |
|           | <i>S. minor</i>              | SM1    | 1,289            | 2                 | 1,185           | 395                 |
|           | <i>S. sclerotiorum</i>       | 1980   | 1,289            | 2                 | 1,185           | 395                 |
|           | <i>S. sclerotiorum</i>       | 44Ba1  | 1,289            | 2                 | 1,185           | 395                 |
|           | <i>S. sclerotiorum</i>       | 44Ba12 | 1,289            | 2                 | 1,185           | 395                 |
|           | <i>B. cinerea</i>            | T4     | 1,248            | 2                 | 1,143           | 381                 |
|           | <i>M. laxa</i>               | -      | 1,176            | 2                 | 1,065           | 354                 |
|           | <i>M. fructigena</i>         | -      | 1,176            | 2                 | 1,065           | 354                 |
|           | <i>M. fructicola</i>         | -      | 1,176            | 2                 | 1,065           | 354                 |
|           | <i>M. vaccinii-corymbosi</i> | RL1    | 1,172            | 2                 | 1,065           | 354                 |
| MAT1-2-10 | <i>S. trifoliorum</i>        | G22    | 925              | 1                 | 879             | 293                 |
|           | <i>S. minor</i>              | SM1    | 941              | 2                 | 843             | 281                 |
|           | <i>S. sclerotiorum</i>       | 1980   | 944              | 2                 | 846             | 282                 |
|           | <i>S. sclerotiorum</i>       | 44Ba1  | 944              | 2                 | 846             | 282                 |
|           | <i>S. sclerotiorum</i>       | 44Ba12 | 944              | 2                 | 846             | 282                 |
|           | <i>B. cinerea</i>            | T4     | 1,517            | 3                 | 1,230           | 409                 |
|           | <i>M. laxa</i>               | -      | 957              | 2                 | 861             | 286                 |
|           | <i>M. fructigena</i>         | -      | 957              | 2                 | 861             | 286                 |
|           | <i>M. fructicola</i>         | -      | 957              | 2                 | 861             | 286                 |
|           | <i>M. vaccinii-corymbosi</i> | RL1    | 1,817            | 4                 | 1,263           | 420*                |

\*The C-terminus of the *Mvc*-RL1 MAT1-1-1 protein is truncated, the truncated sequence is found fused to the C-terminus of the *Mvc* RL1 MAT1-2-10 protein.

Yow et al., **Genome Sequence of *Monilinia vaccinii-corymbosi* Sheds Light on Mummy Berry Disease Infection of Blueberry and Mating Type**

TABLE S15. *Monilinia vaccinii-corymbosi* sequences identified with GO terms for mating processes.

| Description                          | Mvc Sequences                                                                                                                                                                                                                                                                                                                                                                                                                                                    |
|--------------------------------------|------------------------------------------------------------------------------------------------------------------------------------------------------------------------------------------------------------------------------------------------------------------------------------------------------------------------------------------------------------------------------------------------------------------------------------------------------------------|
| Mating type switching                | MvcIVH1_00649; MvcIVH1_00885; MvcIVH1_02894; MvcIVH1_03419; MvcIVH1_04274; MvcIVH1_05665; MvcIVH1_06290; MvcIVH1_06331; MvcIVH1_07527; MvcIVH1_08737; MvcIVH1_08742                                                                                                                                                                                                                                                                                              |
| Gene conversion at mating-type locus | MvcIVH1_00330; MvcIVH1_00649; MvcIVH1_01179; MvcIVH1_01358; MvcIVH1_02195; MvcIVH1_02798; MvcIVH1_02824; MvcIVH1_05002; MvcIVH1_06283; MvcIVH1_06870                                                                                                                                                                                                                                                                                                             |
| Pheromone signaling                  | MvcIVH1_01267; MvcIVH1_01531; MvcIVH1_01568; MvcIVH1_01613; MvcIVH1_02063; MvcIVH1_02418; MvcIVH1_02606; MvcIVH1_02851; MvcIVH1_03515; MvcIVH1_04596; MvcIVH1_06286; MvcIVH1_07646; MvcIVH1_07740; MvcIVH1_07741; MvcIVH1_07923; MvcIVH1_09031                                                                                                                                                                                                                   |
| Cellular fusion                      | MvcIVH1_00037; MvcIVH1_01267; MvcIVH1_01531; MvcIVH1_01568; MvcIVH1_01613; MvcIVH1_01840; MvcIVH1_01841; MvcIVH1_02063; MvcIVH1_02121; MvcIVH1_02418; MvcIVH1_02606; MvcIVH1_02648; MvcIVH1_02851; MvcIVH1_02944; MvcIVH1_03079; MvcIVH1_03515; MvcIVH1_04464; MvcIVH1_04596; MvcIVH1_05025; MvcIVH1_06000; MvcIVH1_06279; MvcIVH1_06286; MvcIVH1_06290; MvcIVH1_06656; MvcIVH1_07315; MvcIVH1_07646; MvcIVH1_07740; MvcIVH1_07741; MvcIVH1_09031; MvcIVH1_09361 |
| Heterokaryon incompatibility         | MvcIVH1_00069; MvcIVH1_01659; MvcIVH1_01678; MvcIVH1_01686; MvcIVH1_03598; MvcIVH1_04121; MvcIVH1_04503; MvcIVH1_04515; MvcIVH1_04874; MvcIVH1_05018; MvcIVH1_05021; MvcIVH1_05047; MvcIVH1_05066; MvcIVH1_05100; MvcIVH1_06116; MvcIVH1_06718; MvcIVH1_07263; MvcIVH1_08040; MvcIVH1_08203; MvcIVH1_08574                                                                                                                                                       |
